# Supplementary material
Source: PubMed Central journal article supplement (PMC10845386)
Supplement: sj-pdf-3-jfm-10.1177_1098612X211066268.pdf [file sj-pdf-3-jfm-10.1177_1098612X211066268.pdf]

# 2022年 猫の急性疼痛管理に関する ISFM コンセンサス・ガイドライン

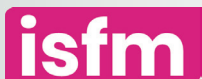

**Paulo V Steagall**  
MV, MSc, PhD, DACVAA

**Sheilah Robertson**  
BVMS (Hons), PhD, DACVAA,  
DECVAA, DACAW,  
DECAWBM (WSEL), MRCVS

**Bradley Simon**  
DVM, MSc, DACVAA

**Leon N Warne**  
BSc (Biol), BBiomedSc (Hons1),  
BSc, BVMS, MVS, MANZCVS,  
DACVAA, PhD

**Yael Shilo-Benjamini**  
DVM, DACVAA

**Samantha Taylor**  
BVetMed (Hons), CertSAM, MAN-  
ZCVS, DipECVIM-CA

Journal of Feline Medicine and  
Surgery (2022) 24, 4–30

DOI: 10.1177/1098612X211066268

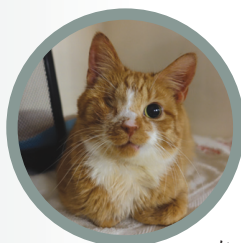

**臨床との関連性：**世界中で猫の飼育頭数が増加していることは、医療ケアを必要としている猫が増加していることを意味している。急性疼痛は、疾患や外傷、手術にともなって発生するが、猫に対する最適な福祉という観点から、疼痛には効果的な管理が必要である（すなわち、肉体的ならびに精神的な健康）。個々の患者に対する疼痛管理プランは、すでに検証されている疼痛評価のツールを基にして、薬物療法と非薬物療法をあわせて行う。疼痛管理にとって重要な原則は、局所麻酔を含めた予防的かつマルチモーダルな鎮痛を行うことであり、鎮痛薬の選択は疼痛の種類と程度、併発疾患の有無ならびに副作用の回避を考慮に入れる必要がある。疼痛管理ケアには、猫に関わるすべての人によるチームアプローチはもとより、看護ケア、環境の改善、猫にやさしいハンドリングが極めて重要である。

**臨床上の課題：**これまで猫の疼痛はあまり認識されてこなかった。これは疼痛評価ツールが広く普及していなかったことに加えて、この動物種の痛みの表現が微妙なことに由来する。猫に特有な代謝や併発疾患によって、痛みの治療が不十分であったり、末梢性、中枢性感作が進行していることがある。さまざまな鎮痛薬の入手や経験の不足によって、効果的な疼痛管理ができていない可能性がある。

**エビデンス・ベース：**このガイドラインは、入手可能な文献と著者の経験に基づいて、専門医委員会と国際猫医学会 (ISFM) によって作成されたものである。一般開業医を対象としており、患者である猫の急性疼痛の評価、予防ならびに管理を支援し、効果的な鎮痛薬の選択と投与に関する実践的なガイドラインを提供することを目的としている。

**キーワード：**急性、鎮痛、抗炎症薬、行動、歯科、表情、痛みの評価、オピオイド、卵巣子宮摘出術

## はじめに

近年、猫の個体数は大幅に増加しており、米国とカナダで飼育されている猫は7,000万頭と推定されている<sup>1,2</sup>。これらの個体には、獣医師によるケアが必要であり、ほとんどの猫は生涯とおして少なくとも1回の手術（すなわち、選択的中性化）を受ける。そのほかには入院、診断検査、静脈内点滴、緩和ケアなどが必要な疾患や外傷がある。効果的な急性疼痛の管理には、上述のシナリオの

すべてとは言わないまでも、ほとんどの場合、効果的な急性疼痛の管理が必要であり、猫の診療に不可欠な部分である。疼痛は、猫の福祉にとってネガティブな影響を

及ぼす。猫を診療する個々の獣医師は、身体検査で体温、心拍数、呼吸数 (TPR)、栄養学的評価を記録するのに加えて、痛みの評価を毎回行うのが基本的な要件である。そのためには、猫の痛みを十分に認識し、管理することが必要であり、その視点は動物種によって異なる。

猫の疼痛管理に関するわれわれの知識は、近年増え続けている。猫の疼痛管理について、異なった視点からのレビュー文献がいくつか発表されている<sup>3-6</sup>。さらに、現在では猫の急性疼痛を評価するのに妥当と考えられているスケールが3つ報告されており、これらはすべて顔の表情と猫に特有な行動を基にしている<sup>7-10</sup>。これらの報告は、すべてカット・オフ値に達した場合の鎮痛の必要性

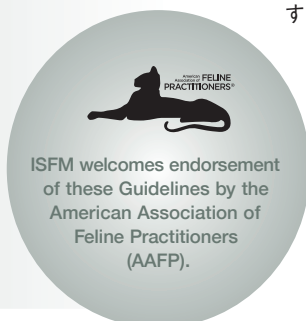

**jfms**  
Journal of Feline  
Medicine and Surgery

**SAGE**

DOI: 10.1177/1098612X211066268  
© ISFM and AAFP 2022

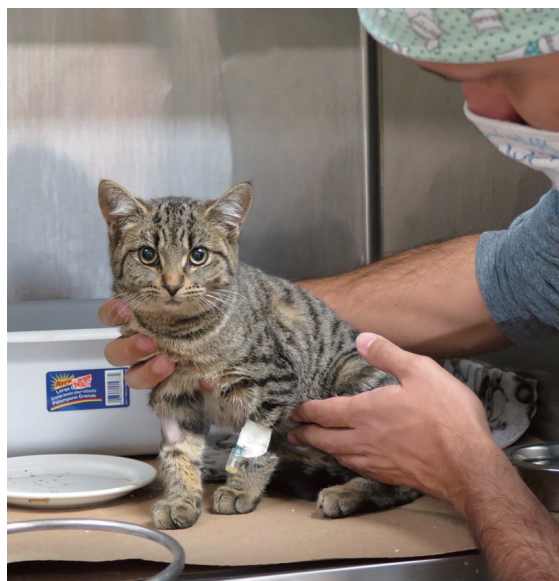

図1 猫にやさしいハンドリング・テクニックは、猫と接する場面すべてで行われるべきである。このテクニックを使用することは、猫のストレスを軽減し、スタッフの安全性を向上させ、患者、クライアント、動物医療ケアチームによりよい結果をもたらし、最適な医療を提供することができる。猫の普段の行動を観察し、落ち着いて患者に近づき、撫でて痛みのある部分をやさしく触診する写真はPaulo Steagallの厚意による

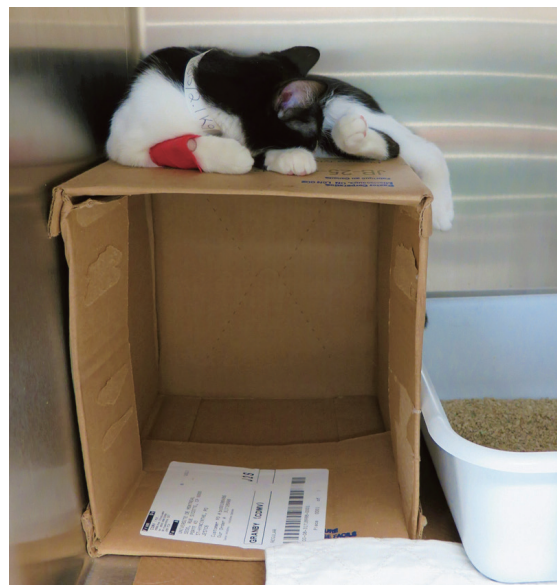

図2 病院内の環境は患者の痛みの経験に影響を与える。猫に特有なニーズを考慮して、静かで快適な場所を提供する。入院スペースに段ボール箱を設置すれば、猫に高い場所（安全な場所）を提供できる。このような簡単なエンリッチメント対策を行うだけでも、病院での体験を良いものにでき、ストレスを軽減することができる写真はPaulo Steagallの厚意による

に関する臨床的なガイドラインを提供している。とはいえ、カット・オフ値に達していない場合でも、臨床獣医師が「この猫には痛みがある」と感じれば、疼痛管理を開始することがある。有効な疼痛評価システムの出現によって、臨床の現場でも疼痛を認識し、評価するわれわれの能力が向上している。また、確固とした調査と臨床研究につながり、猫に特化した薬剤を承認するためのより客観的な評価の指標を提供するようになった。

われわれはもはや、猫の鎮痛技術や投与計画について、犬の情報を流用することはない。公開されている文献には、猫に特異的な薬物動態・薬物力学的な研究が含まれている。猫専用のオピオイドと非ステロイド系消炎鎮痛薬（NSAIDs）が猫の臨床医に販売されるようになり、飼い主は猫に安全で効果的な鎮痛治療を期待するようになってきている<sup>11,12</sup>。歴史的にみると、これまで猫の疼痛管理は軽視されてきた<sup>13</sup>。幸い、この状況は変わりつつあり、進歩が続いているが<sup>14</sup>、いまだ改善の余地は残されている。たとえば、臨床の現場では疼痛の評価が十分に行われているとは言えず、検証済の疼痛評価ツールが広く小動物臨床に普及しているわけではない<sup>15</sup>。多くの獣医師がルーチンな手技（例：中性化）後、あるいは退院後の猫に鎮痛薬を投与、処方していない<sup>16</sup>。

このような状況を踏まえ、国際猫医学会（ISFM）は、最新のエビデンスをベースとした情報と専門家

猫は個性的で、  
とくに病院で  
恐怖や不安、ストレス  
があると、その行動も  
独特なものになる

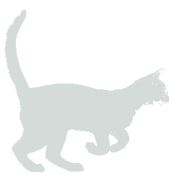

のコンセンサスを基にした急性疼痛管理に関するガイドラインを提供する。このガイドラインは、重要な研究が必要な分野と猫の福祉という観点からみた疼痛管理のキーポイントを強調している。全体を通して、マルチモーダルかつ予防的な疼痛へのアプローチの有用性はもとより、非薬物学的、薬物学的治療、猫にやさしいハンドリング・テクニック、猫のに対する敬意と共感についてもフォーカスしている。

## 猫の疼痛評価と認識

### 疼痛評価の原則

猫には個性があり、病院内で恐怖、不安、ストレスを感じた場合の行動は独特である。疼痛の評価と治療は、疼痛管理というパズルの一部にしかすぎず、すべての操作、身体検査は猫にやさしいハンドリング・テクニックを使って行う必要がある（図1）<sup>17</sup>。疼痛管理とは、鎮痛薬を投与することだけに留まらず、入院している猫の感情を考え（図2）、個々に対して常に敬意と共感をもって治療に当たるべきである。

疼痛の評価は適切な治療への第一歩であり、疼痛を認識できないということは、不適切な治療（鎮痛処置がうまくいっていない、すなわち急性疼痛の治療不足）の主要な原因となりうる<sup>16</sup>。疼痛の認識には、

病院内での‘猫’の反応を理解する必要がある。疼痛のサインは微妙で誤認されることがある。たとえば、恐怖が原因であまり動かないとか、“固まっている”などである。したがって、動物医療チームと飼い主は、両者とも疼痛評価スキルを改善するために訓練する必要があり、これを達成するには、いくつかのウェブサイトが有用である<sup>18-20</sup>。生理学的変化を単独で使用すると、各種疾患、恐怖、ストレスに影響されることから、疼痛評価に信頼性を欠く<sup>21-23</sup>。また、痛みをとまなう猫は食欲がないことが多いことから、食欲は“痛みの指標”の1つである<sup>24</sup>。

急性疼痛の評価は全体的に主観的なものであるが、特定のガイドラインと評価ツールを使用すれば、主観とバイアスを低減することができる（後述）。猫やその他の動物では、すべての評価は獣医師や介護者の観察に依存するため、“観察者による結果 observer-related outcome”と呼ばれる。観察項目として姿勢、通常の行動、快適性、活動性、態度、身体的位置、顔の表情によって行いが、これらに限定されるわけではない。これにあわせて、猫に挨拶しながら外傷あるいは疼痛があると思われる部分をやさしく触診するという動的で相互的なアプローチが推

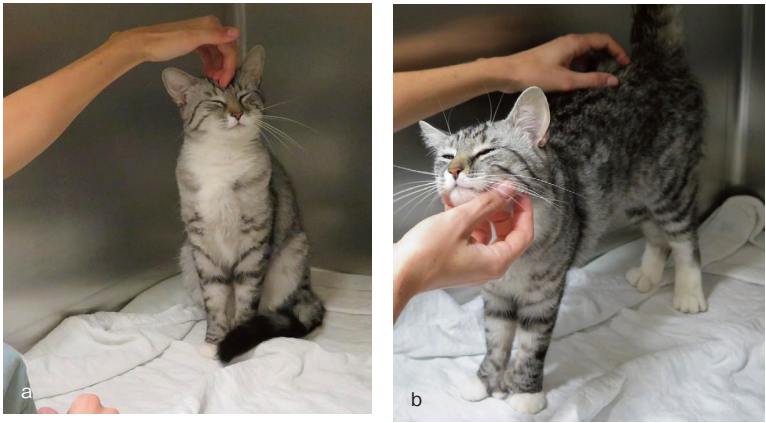

図3 臨床的な疼痛評価では、1) 姿勢、通常の行動、快適性、活動性、態度、身体的位置、顔の表情の観察、2) 動物に挨拶し、外傷や痛みのある部位をやさしく触診するなどの動的かつ双方向のアプローチを行う。触れたり、触診した際に得られる反応は、臨床的な判断や痛みの感覚識別領域（強さ、場所、持続時間）を決定するのに役立つ  
(a) 手術前の健康な猫の検査を行う。猫の正常な行動を観察した後、ケージを開け、患者にやさしく近づいて撫でる  
(b) 猫は観察者との交流に反応し、友好的な態度を示す。猫が苦痛を感じていなければ、術後もこの動作がみられる  
画像はSteagall and Monteiro (2019)<sup>5</sup>より転載

奨される。これは重要なステップであり、それ以外の誘発痛を見落としてしまう可能性がある。すなわち、疼痛がうまくコントロールされていれば、猫の

表1 痛みが原因による猫の急性痛を示唆する行動

| 行動のカテゴリー                           | 動作の説明                                                                                                                                                                                                                      |
|------------------------------------|----------------------------------------------------------------------------------------------------------------------------------------------------------------------------------------------------------------------------|
| 腹痛とさまざまな痛みの状態                      |                                                                                                                                                                                                                            |
| 姿勢と活動                              | <ul style="list-style-type: none"><li>❖ しゃがんだ/前かがみの姿勢</li><li>❖ 骨盤の四肢を伸ばしたり縮めたりして背外側に横たわっている</li><li>❖ 静かに横になっている</li><li>❖ 腹筋（脇腹）の収縮</li><li>❖ 発声（うなり声、うめき声、遠吠え、シューという音）</li><li>❖ 抑うつ/鈍い思考</li><li>❖ 落ち着きのなさ</li></ul>   |
| 観察者と環境との相互作用                       | <ul style="list-style-type: none"><li>❖ 周囲への関心の欠如</li><li>❖ 引きこもり/隠れる</li><li>❖ ケージの後ろを向く</li><li>❖ 刺激の後に動くのをためらう</li><li>❖ 観察者と遊んだり交流したりしたくない</li><li>❖ 観察者から隠れようとする/逃げようとする</li><li>❖ イライラ</li><li>❖ 攻撃的/自己防衛的</li></ul> |
| その他の動作                             | <ul style="list-style-type: none"><li>❖ 傷への過度の注意（舐める、噛む）</li><li>❖ 傷の触診に対する反応</li><li>❖ 毛づくろいおよび/または食欲の低下</li></ul>                                                                                                        |
| 顔の表情                               | <ul style="list-style-type: none"><li>❖ 耳が引き離されて外側に回っている</li><li>❖ 目を細めている</li><li>❖ 引き締まったマズル（楕円形）</li><li>❖ まっすぐなひげ（前を向いている）</li><li>❖ 頭の位置が下がっている（肩のラインに対して）</li></ul>                                                  |
| 術後の痛み（例：抜歯後）                       |                                                                                                                                                                                                                            |
| 一般的な動作                             | <ul style="list-style-type: none"><li>❖ 活動量の減少</li><li>❖ 動きたがらない</li><li>❖ 遊び心の減少</li><li>❖ ドライフードを食べるのが困難</li><li>❖ 頭が震える</li></ul>                                                                                       |
| Steagall (2020) より転載 <sup>27</sup> |                                                                                                                                                                                                                            |

多くの獣医師は、退院後や去勢手術など日常的な処置後に、猫に鎮痛剤を投与したり処方したりすることはない。

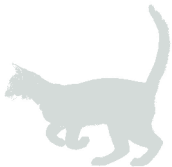

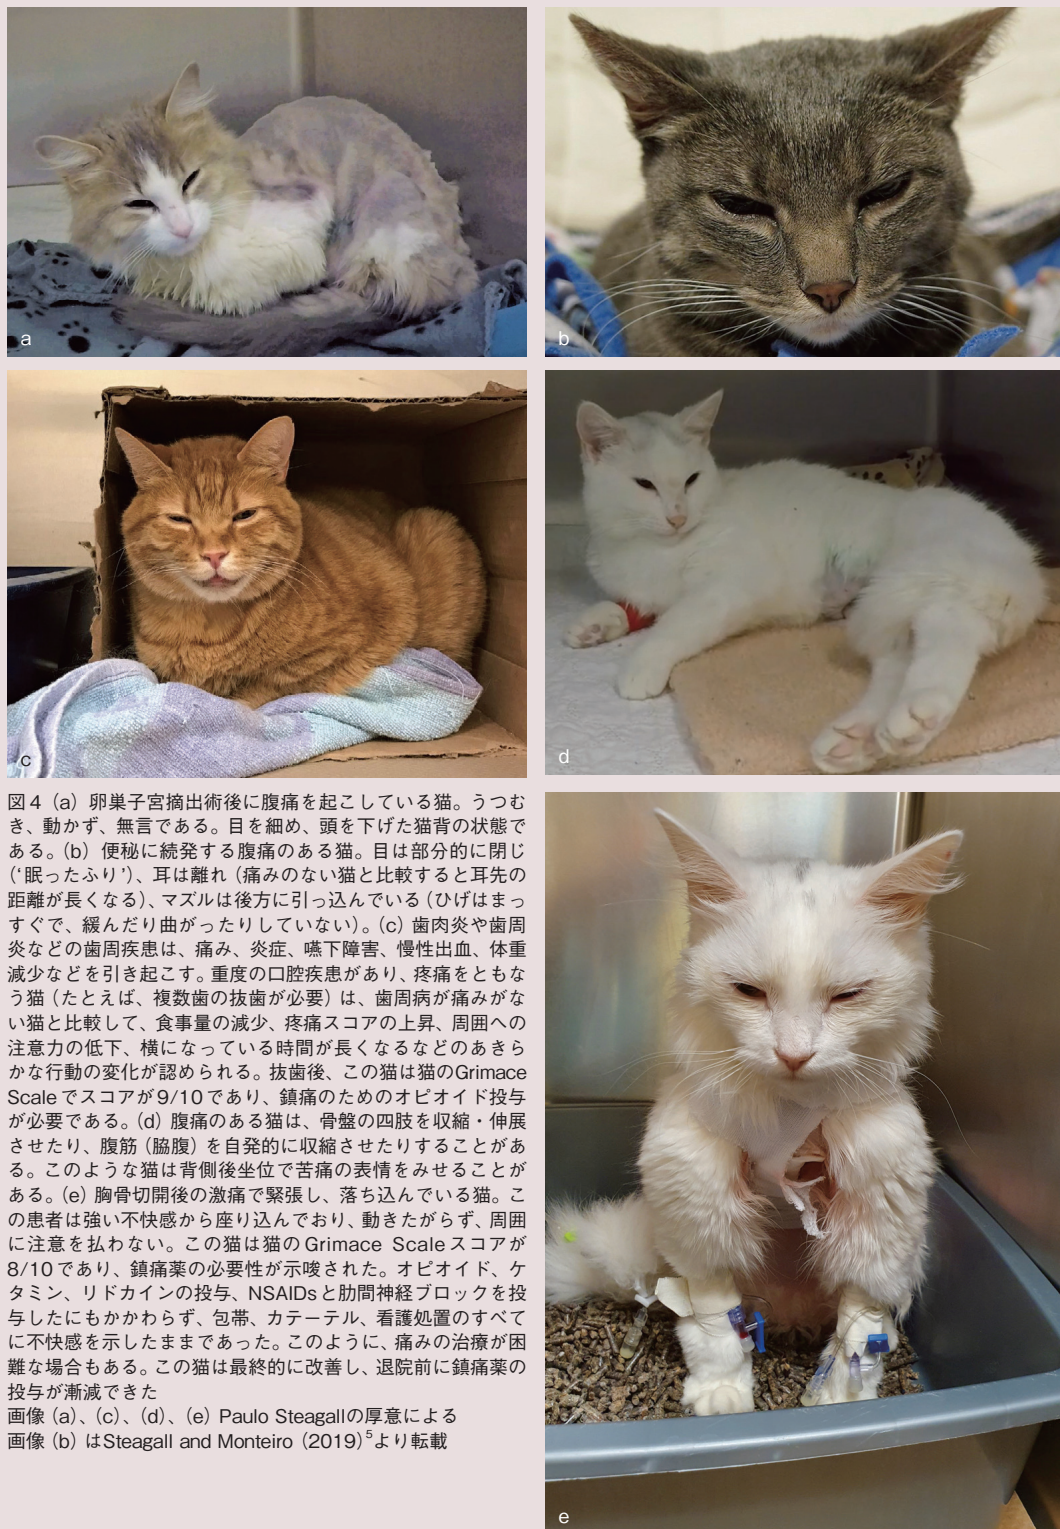

図4 (a) 卵巣子宮摘出術後に腹痛を起こしている猫。うつむき、動かず、無言である。目を細め、頭を下げた猫背の状態である。(b) 便秘に続発する腹痛のある猫。目は部分的に閉じ(「眠ったふり」)、耳は離れ(痛みのない猫と比較すると耳先の距離が長くなる)、マズルは後方に引っ込んでいる(ひげはまっすぐで、緩んだり曲がったりしていない)。(c) 歯肉炎や歯周炎などの歯周疾患は、痛み、炎症、嚥下障害、慢性出血、体重減少などを引き起こす。重度の口腔疾患があり、疼痛をともなう猫(たとえば、複数歯の抜歯が必要)は、歯周病が痛みがない猫と比較して、食事量の減少、疼痛スコアの上昇、周囲への注意力の低下、横になっている時間が長くなるなどのあきらかな行動の変化が認められる。抜歯後、この猫は猫のGrimace Scaleでスコアが9/10であり、鎮痛のためのオピオイド投与が必要である。(d) 腹痛のある猫は、骨盤の四肢を収縮・伸展させたり、腹筋(脇腹)を自発的に収縮させたりすることがある。このような猫は背側後坐位で苦痛の表情をみせることがある。(e) 胸骨切開後の激痛で緊張し、落ち込んでいる猫。この患者は強い不快感から座り込んでおり、動きをたがわず、周囲に注意を払わない。この猫は猫のGrimace Scaleスコアが8/10であり、鎮痛薬の必要性が示唆された。オピオイド、ケタミン、リドカインの投与、NSAIDsと肋間神経ブロックを投与したにもかかわらず、包帯、カテーテル、看護処置のすべてに不快感を示したままであった。このように、痛みの治療が困難な場合もある。この猫は最終的に改善し、退院前に鎮痛薬の投与が漸減できた

画像(a)、(c)、(d)、(e) Paulo Steagallの厚意による  
画像(b)はSteagall and Monteiro (2019)<sup>5</sup>より転載

痛みをともなう  
状態では  
“見せかけの睡眠”  
が観察されることがあり、痛みの  
行動を知らない  
飼い主や  
専門家が“休んで  
いる猫”と誤って  
解釈する  
可能性がある。

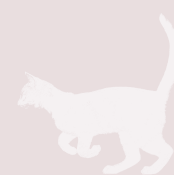

強い反応なしに手術創の周囲を触診することができるはずである(図3)。

猫の痛みに関連する行動(表1)は、とくに腹部の手術と抜歯を行った場合(図4)に詳述されている<sup>25,26</sup>。手術直後から時間が経過して、新たな行動がみられたり、以前の行動がなくなった場合には、

痛みを示している可能性がある。たとえば、フレンドリーで痛みのない猫の多くは、猫のケアチームとふれあい、優しい腹部触診を受け入れ、伸びや遊び、あくびといった正常な動作をするものである。また、猫は入院中に‘ベーグル’、‘クロワッサン’、‘プレッツェル’のような丸まった格好で眠る(図5)。このよ

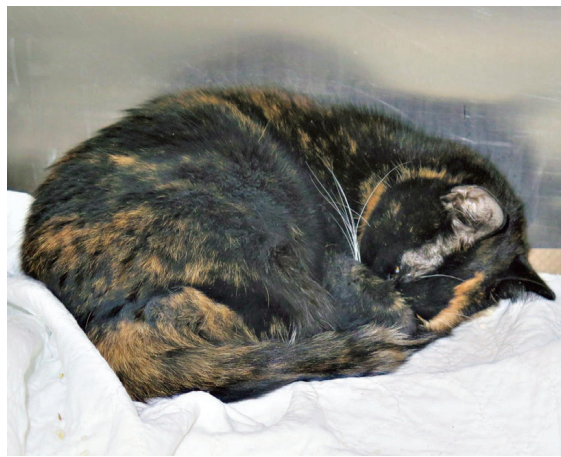

図5 このように痛みがない猫の丸まった姿勢は、体温を保持するための正常な姿勢であり、痛みのある猫には通常みられない  
画像はSteagall and Monteiro (2019)<sup>5</sup>より転載

うな猫は、周囲に興味を持ち、撫でると反応する。食事と毛づくろいは、術後の経過が良好で快適な猫にみられる正常な行動である。猫が痛みを感じている場合には、このような行動はすぐに消失することがある。猫のケアチーム全員が疼痛評価について訓練を受け、積極的に関与することが重要である。

疼痛評価は定期的に行うのがベストである。ただし、この評価は猫が食事中、毛づくろい中、遊び中、眠っているときには行うべきではない。評価の頻度は、手術後や外傷後の初回評価で気づいた痛みの程度、鎮痛薬の投与や非

薬物治療に対する猫の反応、臨床的な判断を基にして決定する必要がある。手術終了後30～45分で評価し、術後初期は使用した鎮痛薬

疼痛評価の頻度

猫の状態、手術の種類や病状、痛みの程度、入院期間、鎮痛薬に対する個々の反応、年齢、気質、病気、麻酔薬の残存効果などが、痛みの評価の頻度を左右することになる。

| 表2 猫の急性疼痛評価ツールの概要                                                                                                                                                                                             |                                                                                                                             |                                                                                                                                                                              |                                                                                                                                                                                     |
|---------------------------------------------------------------------------------------------------------------------------------------------------------------------------------------------------------------|-----------------------------------------------------------------------------------------------------------------------------|------------------------------------------------------------------------------------------------------------------------------------------------------------------------------|-------------------------------------------------------------------------------------------------------------------------------------------------------------------------------------|
|                                                                                                                                                                                                               | UNESP-Botucatu 多次元猫の痛評価スケール<br>ショートフォーム (UFEPS-SF)                                                                          | グラスゴー猫の複合測定疼痛スケール<br>(グラスゴー猫のCMPS)                                                                                                                                           | 猫のしかめっ面スケール                                                                                                                                                                         |
| 構成要素                                                                                                                                                                                                          | <ul style="list-style-type: none"><li>❖ 姿勢</li><li>❖ 快適性</li><li>❖ 活動性</li><li>❖ 態度</li><li>❖ 触ったり触診したりすることに対する反応</li></ul> | <ul style="list-style-type: none"><li>❖ 発声</li><li>❖ 姿勢と活動</li><li>❖ 傷への注意</li><li>❖ 耳の位置</li><li>❖ マズルの形</li><li>❖ 観察者との相互作用への反応</li><li>❖ 痛む部位の触診</li><li>❖ 質的行動</li></ul> | <p>‘アクションユニット’:</p> <ul style="list-style-type: none"><li>❖ 耳の位置</li><li>❖ 眼窩の締め付け</li><li>❖ マズルの張り</li><li>❖ ひげの位置</li><li>❖ 頭の位置</li></ul>                                        |
| ツールの使用方法                                                                                                                                                                                                      | 4つの質問をする (0-3)。各質問のスコアの合計が、その猫の最終スコアである (合計 12 ポイント)。評価は、邪魔されていない猫の観察から始まる。次に、残りのアイテムの評価のために猫に近づく                           | 各項目を採点する (点数は項目ごとに異なる)。8つの項目すべてのスコアの合計が、その猫の最終スコアである。評価は、顔の表情など、干渉されていない猫の観察から始める。次に、残りのアイテムの評価を行う                                                                           | 各アクションユニットは0-2で評価する。ここで、0 = アクションユニットなし。1 = アクションユニットの中等度な外観、あるいは、アクションユニットがあるかどうかハッキリしない。2 = アクションユニットが明瞭にある外観。目に見えないアクションユニットは得点に入れない。最終的なスコアは、スコアの合計をスコアをつけたアクションユニットの数で割ったものである |
| ツールの検証                                                                                                                                                                                                        | 卵巣子宮摘出術後の術後疼痛をとまなう猫における包括的な妥当性、信頼性、感度および感受性                                                                                 | さまざまな痛みをとまなう状態の猫における構成の妥当性と反応性のエビデンス                                                                                                                                         | リアルタイム評価と画像評価の両方で、さまざまな痛みをとまなう状態の猫、および抜歯前後の猫で、有効性と信頼性が確認されている。このツールは、介護者の存在やアセプロマジン-ブプレノルフィンの投与の影響を受けない。猫の飼い主、動物看護師、学生、獣医師の観察者間の信頼性が報告されている                                         |
| 介入スコア*                                                                                                                                                                                                        | ≥ 4/12                                                                                                                      | ≥ 5/20                                                                                                                                                                       | ≥ 0.4/1.0                                                                                                                                                                           |
| コメント                                                                                                                                                                                                          | 内科的および外科的痛みの両方に使用でき、有効性が報告されている。ショートバージョンのツールは、以前行われていたロングバージョンのツールの限界を克服している                                               | 簡単かつ迅速に使用できる                                                                                                                                                                 | 高い識別能力、良好な観察者間の信頼性、優れた評価者内の信頼性、および優れた採点者間の一貫性が報告されている。簡単かつ迅速に使用できる                                                                                                                  |
| ソース                                                                                                                                                                                                           | 猫の急性痛とスケールの使い方に関するビデオベースのトレーニングは、Animal Painのウェブサイトが利用できる                                                                   | <a href="http://newmetrica.com/acute-pain-measurement/download-pain-questionnaire-for-cats">newmetrica.com/acute-pain-measurement/download-pain-questionnaire-for-cats</a>   | <a href="http://felinegrimacacescale.com">felinegrimacacescale.com</a>                                                                                                              |
| Steagall (2020) より転載 <sup>27</sup><br>* 鎮痛薬の投与が必要となる‘カットオフ’値。猫が痛みを感じていると思われる場合には、カットオフ値に達していなくても、獣医師が治療介入を行うことがあることに注意する<br>UNESP = Universidade Estadual Paulista; UFEPS = UNESP 猫疼痛スケール (Feline Pain Scale) |                                                                                                                             |                                                                                                                                                                              |                                                                                                                                                                                     |

| 表3 UNESP-Botucatu 多次元猫の疼痛評価スケール<br>ショートフォーム (UFEPS-SF)                                                                                      |                                                         |     |
|---------------------------------------------------------------------------------------------------------------------------------------------|---------------------------------------------------------|-----|
| アイテム                                                                                                                                        | 説明                                                      | スコア |
| ケージ内の猫の姿勢を 2 分間評価する                                                                                                                         |                                                         |     |
| 1                                                                                                                                           | ❖ 自然だが緊張している、動かない、ほとんど動かない、または動きたがらない                   | 0   |
|                                                                                                                                             | ❖ 猫背の姿勢および/または背側臥位                                      | 1   |
|                                                                                                                                             | ❖ 頻繁に体位を変える、または落ち着かない                                   | 2   |
|                                                                                                                                             | ❖ 猫は、後肢を収縮または伸展させたり、腹筋（脇腹）を収縮させている*                     | 3   |
| 2                                                                                                                                           | ❖ 猫は後肢の屈曲や伸展、腹筋の収縮が個別あるいは両者がみられる（脇腹）*                   | □   |
|                                                                                                                                             | ❖ 猫の目は部分的に閉じている（この項目は、麻酔終了後 1 時間まで評価しない）*               | □   |
|                                                                                                                                             | ❖ 猫は手術創を舐めたり噛んだりしている*                                   | □   |
|                                                                                                                                             | ❖ 猫はしっぽを強く動かしている*                                       | □   |
|                                                                                                                                             | ❖ 上記のすべての行動はない                                          | 0   |
|                                                                                                                                             | ❖ 上記の行動のいずれか 1 つがある                                     | 1   |
|                                                                                                                                             | ❖ 上記の行動のうち 2 つがある                                       | 2   |
|                                                                                                                                             | ❖ 上記の行動が 3 つまたはすべてある                                    | 3   |
| ケージを開けたときの活動性と態度、ならびに観察者や周囲に対する猫の注意力の評価                                                                                                     |                                                         |     |
| 3                                                                                                                                           | ❖ 快適で周囲に気が配れる                                           | 0   |
|                                                                                                                                             | ❖ 物静かで周囲にやや気が配れる                                        | 1   |
|                                                                                                                                             | ❖ 静かで、気が配れない。猫はケージの奥を向いていることがある                         | 2   |
|                                                                                                                                             | ❖ 不快で、落ち着きがなく、周囲にやや気が配れるか、あるいは気が配れない。猫はケージの奥を向いていることがある | 3   |
| 触れたときの猫の反応を評価し、続けて痛みのある部位を圧迫する                                                                                                              |                                                         |     |
| 4                                                                                                                                           | ❖ 反応しない                                                 | 0   |
|                                                                                                                                             | ❖ 痛みのあるところを触っても反応しないが、軽く押すと反応する                         | 1   |
|                                                                                                                                             | ❖ 痛みのあるところを触ったり、押したりすると反応する                             | 2   |
|                                                                                                                                             | ❖ 触ったり、触診することができない                                      | 3   |
| Belli et al (2021) より <sup>9</sup><br>*該当する箇所にチェックを入れる<br>UNESP = Universidade Estadual Paulista; UFEPS = UNESP 猫疼痛スケール (Feline Pain Score) |                                                         |     |

と手技に応じて、1 時間ごとに評価する。評価は患者の快適性を確保するために、退院するまで継続する必要がある<sup>26</sup>。退院後は、痛みの徴候を探す訓練を受けた猫の世話をする人が自宅で評価を続けることができる。

猫の急性疼痛の評価についての詳細なレビューはほかの文献に記載されている<sup>5</sup>。

疼痛評価ツール

疼痛評価ツールを使用することで、痛みに対して一貫性のある実用的で客観的な評価ができる。多忙な病院業務のなかで、複数のチームメンバーが痛みの評価に参加する場合、構造化された（評価が確立された）ツールを使用すると、観察者ごとの評価のばらつきを低減することができる。

現在、猫での有効性が報告されている使いやすい 3 つの疼痛評価ツールがある（表 2）。グラスゴー猫の複合測定疼痛スケール（Glasgow composite measure pain scale-feline<sup>7</sup>、UNESP-Botucatu 多次元猫の疼痛評価スケールショートフォーム：UNEP-Botucatu multidimensional feline pain assessment scale short form。表 3）、猫のしかめっ面スケール（Feline Grimace Scale）である<sup>7-9, 24, 28-32</sup>。われわれが直面している課題は、この情報をいかに拡散し、これらのツールやシステムをいかに診療に取り入れるか、動物医療チームをいかにトレーニングするかである。顔の表情は、これら 3 つの急性疼痛評価ツールすべてに組み込まれている。Grimace Scale (felinegrimacescale.com) は、完全に顔の‘アクション・ユニット’に基づいて作成されている（図 6）<sup>8, 29, 30, 33</sup>。これらのスケールは、鎮痛薬の投与が必要であるかどうかのカットオフ値

疼痛評価ツールを使用することで、一貫性があり、実用的で、より客観的な疼痛評価を行うことができる。

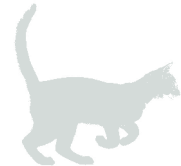

図 6 猫のしかめっ面スケール (Feline Grimace Scale) の図解と説明。この疼痛評価ツールは、5 つのアクションユニット (AU)。耳の位置、眼窩の締め付け、マズルの張り、ひげの位置、頭の位置) で構成されている。それぞれ 0 から 2 のスコアで評価する：0 = AU なし、1 = AU が中程度に出現、またはその有無が不明、2 = AU が明瞭に出現  
Evangelista et al (2020) より引用<sup>29</sup>

|                                                                                                                                                             |                                                                                                                                                           |                                                                                                                                                                                |
|-------------------------------------------------------------------------------------------------------------------------------------------------------------|-----------------------------------------------------------------------------------------------------------------------------------------------------------|--------------------------------------------------------------------------------------------------------------------------------------------------------------------------------|
|                                                                                                                                                             |                                                                                                                                                           |                                                                                                                                                                                |
| <b>0=AU なし</b>                                                                                                                                              | <b>1=AU が中程度に出現</b>                                                                                                                                       | <b>2=AU が明瞭に出現</b>                                                                                                                                                             |
| <ul style="list-style-type: none"><li>❖ 耳は前を向いている</li><li>❖ 眼は開いている</li><li>❖ マズルはリラックスしている (円形)</li><li>❖ ひげは力が入ってなく、カーブしている</li><li>❖ 頭は肩の高さより上</li></ul> | <ul style="list-style-type: none"><li>❖ 耳は前を向いている</li><li>❖ 眼は開いている</li><li>❖ マズルは軽度緊張している</li><li>❖ ひげはわずかにまっすぐあるいはカーブしている</li><li>❖ 頭は肩の高さと同じ</li></ul> | <ul style="list-style-type: none"><li>❖ 耳は平坦で外側に回転している</li><li>❖ 眼は細目</li><li>❖ マズルは緊張している (楕円形)</li><li>❖ ひげはまっすぐで前方に出ている</li><li>❖ 頭は肩の高さより下、あるいは下を向いている (あごは胸の方向)</li></ul> |

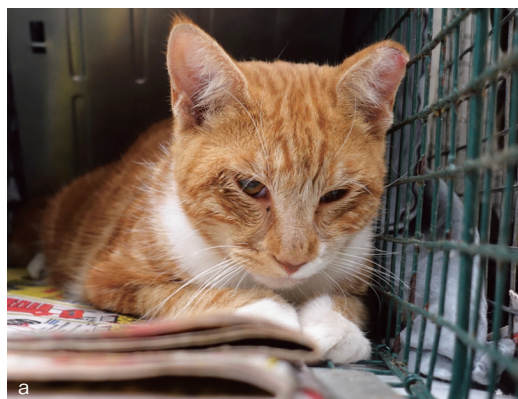

図7 (a, b) 捕獲-中性化-返還 (TNR) プログラム、あるいは社会化されていない猫に対応する場合、痛みの評価には限界がある。しかし、猫の姿勢、快適性、表情を観察し、Feline Grimace Scaleを用いて評価することは可能である。痛みの治療は、たとえば傷の触診ができない場合、観察者の解釈に基づいて、マルチモーダルなアプローチを行うべきである。すべての患者と同様にこれらの個体は共感と配慮をもって扱われるべきである  
画像は Sheilah Robertson の厚意による

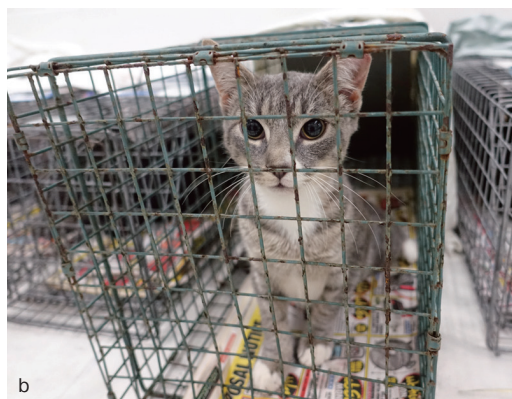

あるいは介入可否のスコアを提供してくれる(表2)。患者である猫をケアする動物看護師やテクニシャンに役立ち、また意志決定を行う獣医師を支援するためのガイダンスとして、疼痛評価ツールを使用することには、明確な利点がある。猫が救助活動を受けた場合、治療が効果的であったことを確認するため、30～45分ごとに痛みの評価を繰り返す。

### 痛みの評価/認識の限界と影響する因子

新しい痛みの評価システムの出現によって、われわれは猫の痛みを認識し、治療する能力が向上している。しかし、これらの手段は潜在的な交絡因子やバイアスを完全に排除しているわけではない。気質(怖がり、神経質など)、なんらかの薬剤の投与(たとえば、鎮静薬やトランクライザー)や疾患によって、疼痛評価が困難になることがある<sup>34-37</sup>。恐怖や不安は姿勢、快適性、顔の表情を変えてしまうため、痛みの評価にバイアスがかかることになる<sup>38</sup>。たとえば、社会化されていない猫の捕獲-中性化-返還(TNR)プログラムなどは、痛みの評価が困難となる(図7)。ケタミンをベースとした鎮静プロトコルは、回復期の早い段階で交絡効果が生じ、疼痛スコアが偽の上昇を示すことがあり、レスキュー鎮痛薬の不必要な投与に繋がる可能性がある<sup>39</sup>。また麻酔薬や薬物の影響が残っていると、痛みの評価にバイアスが生じることになる。痛みは、薬物誘発性の多幸感と鑑別するのが困難な場合がある(囲み記事‘違和感の確認と管理’を参照)。

疼痛スコアは観察者の性別、トレーニングの有無、文化的背景、言語に影響されるため、疼痛評価は真の科学ではなく、差異が生じると考えられている<sup>34-36</sup>。女性やトレーニングを積んだ人は、男性や最小限のトレーニングを受けた人に比べて、より高い痛みのスコアを付けることが分かっている<sup>13, 34, 36</sup>。猫の疼痛評価は猫にやさしいハンドリング・テクニックとともに、獣医学のカリキュラムに組み入れるべきである。

ペイン・マネージメントを行う場合、猫の飼い主は

### 気分不良の認識と管理

手術や内科疾患からの痛みが疑われる場合、オピオイドやNSAIDsなど、鎮痛薬の投与が推奨される(すなわち、‘鎮痛薬チャレンジ’)。それによって、痛みによる行動が治まれば、痛みが存在していたことになる。行動に変化がなかったり、悪化するようであれば、気分不良(dysphoria)の可能性がある。このような場合には、鎮静薬の投与が推奨される。オピオイド拮抗薬も治療の選択肢の1つであるが、鎮痛薬の効果に拮抗して、ほかの鎮痛薬を使用しなければ、猫に痛みを感じさせることになる。ブトルファノールは、ナロキソンよりも鎮痛効果を維持できる可能性があるため、オピオイドアゴニストの逆転薬として、ナロキシンの代わりに投与される<sup>40</sup>。

※2018年に発行されたAAFP猫麻酔ガイドライン(AAFP Feline Anesthesia Guidelines)から転載した、猫の気分不良に対処するための推奨治療を示した‘猫の気分不良へのトラブルシューティング’アルゴリズムを補足資料(24ページ参照)で公開する<sup>41</sup>。

図8 7歳齢の雌猫における抜爪術後の持続的な術後疼痛。左前肢に体重がかからないように、座っているときにも左前肢を上げたままにして、その肢に触られるのを嫌がる  
画像は Monteiro BP and Steagall PV より転載。猫の慢性疼痛: 臨床評価における最近の進歩。Journal of Feline Medicine and Surgery 2019; 21: 601-614

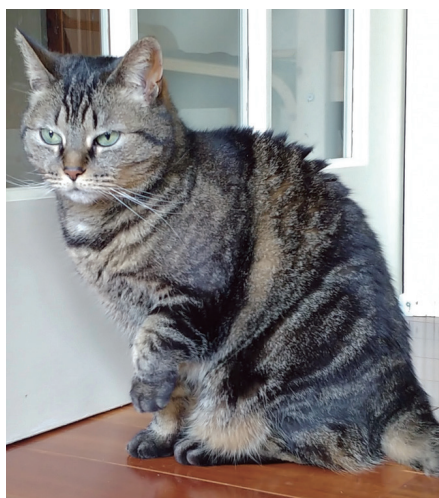

‘チーム’の一員と考えるべきである。痛みがある猫の行動(何を予想し、どのように進めるか)についてのクライアント・エデュケーションが重要であり、飼い主に獣医師の診察を求めるよう促すことで、早期の介入に繋がる可能性がある<sup>5</sup>。たとえば、猫の飼い主は去勢手術や卵巣子宮摘出術後、3日後までにある種の行動変化に気づくことがある<sup>42</sup>。全体的な活動レベルと遊び心の低下、睡眠時間の延長、運動量の変化などが、飼い主から報告されている<sup>42</sup>。

ISFMは猫の急性疼痛に関するCat Care Guideを作成している(icatcare.org/advice/cat-carer-guidesで閲覧可能)。最後に、猫のしかめっ面スケール Feline Grimace Scaleは猫の飼い主、動物看護師、学生にとって信頼できるものであり、家庭環境でも使用できる猫の急性疼痛評価ツールである<sup>33</sup>。

### 疼痛管理-原則と考慮事項

急性痛の認識ならびに適切な治療の失敗は、乏鎮痛(oligoanalgesia)と呼ばれている。痛みがある猫に鎮痛薬を投与しないと、末梢ならびに中枢性に感作が生じ<sup>16, 43</sup>、非侵害刺

| 表4 痛みの神経生理学で使用される用語                      |                                                                                                                |
|------------------------------------------|----------------------------------------------------------------------------------------------------------------|
| 用語                                       | 説明                                                                                                             |
| 末梢性感作                                    | 組織損傷後に起こる疼痛閾値の低下と損傷組織内のケミカルメディエーターの濃度上昇によって引き起こされる。末梢性感作のメディエーターは数多く存在し、これらは一括してエイコサノイドと呼ばれる                   |
| 中枢性感作                                    | 組織損傷後に起こる疼痛閾値の低下に刺激が繰り返されることで、侵害受容経路の感度が変化するのが原因である。中枢性感作のおもな部位は、脊髄後角と脳の高次中枢、とくに大脳皮質である                        |
| 痛覚過敏                                     | 通常であれば痛いと感じるような刺激によって、損傷した組織が刺激されることによる痛みの増加。この刺激は、組織が損傷していない場合よりも、より痛いと感じられる。痛覚過敏は、末梢性および中枢性感作の臨床的徴候である       |
| 異痛症                                      | 通常なら痛いと感じないような刺激によって、損傷した組織が刺激されることによる痛み。組織が損傷しているため、その刺激が痛みとして感じられる。アロディニア (allodynia) は、末梢性および中枢性感作の臨床的徴候である |
| 持続する術後の痛み                                | 手術後感じる痛みが、通常より長く続くこと。術後の持続的な痛みは、手術時の疼痛緩和が不十分であったり、なかったりした場合によくみられる結果である                                        |
| Steagall et al (2021) <sup>44</sup> より引用 |                                                                                                                |

激と侵害刺激に対する侵害受容閾値が低下する可能性がある(表4)<sup>44</sup>。人では、切断、開胸、乳腺切除<sup>45</sup>、帝王切開<sup>46</sup>などの外科処置後の疼痛に対する治療が不十分な場合、慢性疼痛や不適応痛の状態(すなわち、術後疼痛の持続)に移行し、障害やQOLに悪影響を与えることがある。猫にも同様のシナリオが起きる可能性がある<sup>43</sup>。たとえば、抜爪術後などである(図8)。

急性痛の管理の原則を理解することは、効果的な鎮痛戦略の開発に役立ち、鎮痛薬の投与が歴史的に軽視されてきた動物種である猫の無痛覚過敏や有害な結果を軽減または防止することができる。

猫の薬物代謝と排泄：鎮痛薬への影響

猫の薬物代謝と排泄は、ほかの動物種と異なる。これは薬剤選択、用量ならびに投与回数に大きな影響を及ぼす。代謝抱合(すなわち、グルクロン酸抱合、硫酸抱合、グリコシル化)によって排泄される薬剤は、人や犬よりも猫の方がより緩徐に排除される<sup>47</sup>。例としては、アセチルサリチル酸、アセトアミノフェン(パラセタモール)、カルプロフェン、ケトプロフェン、モルヒネなどである。グルクロン酸抱合の欠乏は、アセトアミノフェンなどのフェノール化合物に大きく影響し、赤血球の酸化的障害によって生命を脅かすメトヘモグロビン血症、貧血ならびにハインツ小体形成の原因となる<sup>47,48</sup>。カルプロフェ

代謝されて  
抱合される薬物は、  
通常、犬よりも  
猫の方がゆっくり  
と排泄されるが、  
酸化を受ける薬物  
は、より速やかに  
排泄されることが  
多い。

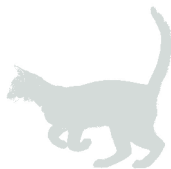

ンのクリアランスは犬よりも猫で著しく遅い(すなわち、猫ではこの薬剤の排泄半減期がきわめて長い)<sup>49</sup>。猫のUDP-グルクロン酸転移酵素(UGT)経路の欠損も、モルヒネのグルクロン酸抱合能が少ないことに関与しているかもしれない。猫はモルヒネを犬と同等の割合で排泄するが、モルヒネ-3-グルクロニドの生成濃度は低く、人の鎮痛に関与する活性化代謝物であるモルヒネ-6-グルクロニドは生成されない<sup>50</sup>。

逆に、おもに酸化を受ける薬剤は、犬よりも猫の方がより急速に排泄することが多い。たとえば、メロキシカム、ピロキシカム、ブプレノルフィン、メペリジン(ペチジン)などである。猫のメロキシカムのおもな排泄経路は、犬と同様に腸(糞便)経由であり、メロキシカムの生体内変化のおもな経路は酸化である<sup>51,52</sup>。

ガバペンチンのように尿や胆汁から排泄される薬剤は、犬と猫で排泄半減期がほぼ同等である<sup>47</sup>。

猫の併発症

痛みの治療を行う際には、併発症についてかならず考えなければならない。10歳を過ぎた猫の40%は、慢性腎臓病(CKD)をもっている<sup>53</sup>。CKDの猫では、排泄に健康な腎臓機能を必要とする薬剤や代謝物が蓄積することがある。したがって、投与量と投与回数は、臨床経験、患者の反応、疼痛評価に基づいて調節する必要がある。高窒素血症は脳血液関門の透過性を高め、結果として薬剤の効果が増強される可能性があることから、薬剤の効果が予測できないことがある。古典的な例として、ケタミンは肝臓で活性化代謝物であるノルケタミンとなり、ケタミン自体とともに腎臓で活性型となって腎臓から排泄される。ケタミンとノルケタミンは蓄積することがあり、尿道閉塞あるいは腎機能障害の猫では麻酔効果が増強して延長する可能性がある。CKDがある猫の代謝性アシドーシスは、ケタミンの体内動態を変化させて、蓄積する可能性がある。腎機能が改善されている場合、猫の皮下尿道バイパス後の術後鎮痛療法として、ケタミンの麻酔下用量(抗痛覚過敏)用量(10 µg/kg/分)の持続点滴投与が問題ないようなので、結果は用量によるのかもしれない<sup>27</sup>。

全体として、麻酔と鎮痛に関する最良の方法は、併発症のある猫にとくに重要である。輸液療法は、脱水、電解質と酸-塩基の不均衡を補正し、適切な腎血流を維持して薬剤の排泄をサポートする。症例によって、安定した腎臓病(国際腎臓学会[IRIS]ステージIまたはII)の脱水がない猫に強い炎症をとともなう手術(たとえば、多数の抜歯、骨折の修復、大きな切除)を行う場合、血圧をコントロールして術中

## 急性疼痛管理の原則

## 予防的鎮痛法

予防的鎮痛法とは、術後疼痛を軽減するためのあらゆる種類の周術期の技術および努力を指す。鎮痛治療は周術期の疼痛緩和のために必要な時期に、必要な時間だけ行う（先制鎮痛とは、術前に鎮痛薬を投与することである）。

## マルチモーダル鎮痛法

マルチモーダル鎮痛法とは、作用機序の異なる2種類以上の鎮痛薬を投与することである<sup>55,56</sup>。多剤併用鎮痛法には、冷却/寒冷療法などの非薬物学的手法も含まれることがある。

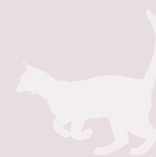

出血のリスクがなければ、最小有効量のNSAIDsの投与を検討できる場合がある。理想的には、麻酔回復後にNSAIDsを投与する前に、猫が食べたり飲んだりしているのが望ましい<sup>54</sup>。

## 鎮痛計画の構築

効果的な鎮痛計画を構築するには、2つの基本的な原則、すなわち予防的な鎮痛ともマルチモーダルな鎮痛に則って行う（上段の囲み記事参照）。

急性疼痛に対する治療のファーストステップは、オピオイドの投与、局所麻酔、NSAIDsの投与である。治療のセカンドステップは、補助的な薬剤の使用である<sup>57</sup>。さらに、副作用の軽減と内分泌ならびに生理反応の悪化を防止するためには、鎮痛と快適性にも重点を置く必要がある。それと同様に重要な

ステップには、抗不安薬と筋弛緩薬、制吐薬、非薬物治療があり、これらは必要に応じて組み込む必要がある（図9）。マロピタントとオンダンセトロンは、猫の周術期に起きる嘔吐を軽減し<sup>58,59</sup>、ガバペンチンとトラゾドンは不安を軽減するために投与することが多い。例として、入院中の投与があげられる<sup>60,61</sup>。可能であれば、（非薬物学的）治療も組み込むべきであり、適切な包帯（外傷ケア）、冷電法<sup>62</sup>（図10）、看護（患者の体位変換、輸液療法、栄養、清掃、グルーミング）、環境（乾燥して、穏やかで静かな快適な環境。図2参照）、そして犬から離れた場所（すなわち、ISFMのキャット・フレンドリー・クリニックあるいはAAFPのキャット・フレンドリー・プログラムの認定要件に合致している）などがあげられる<sup>17,63</sup>。

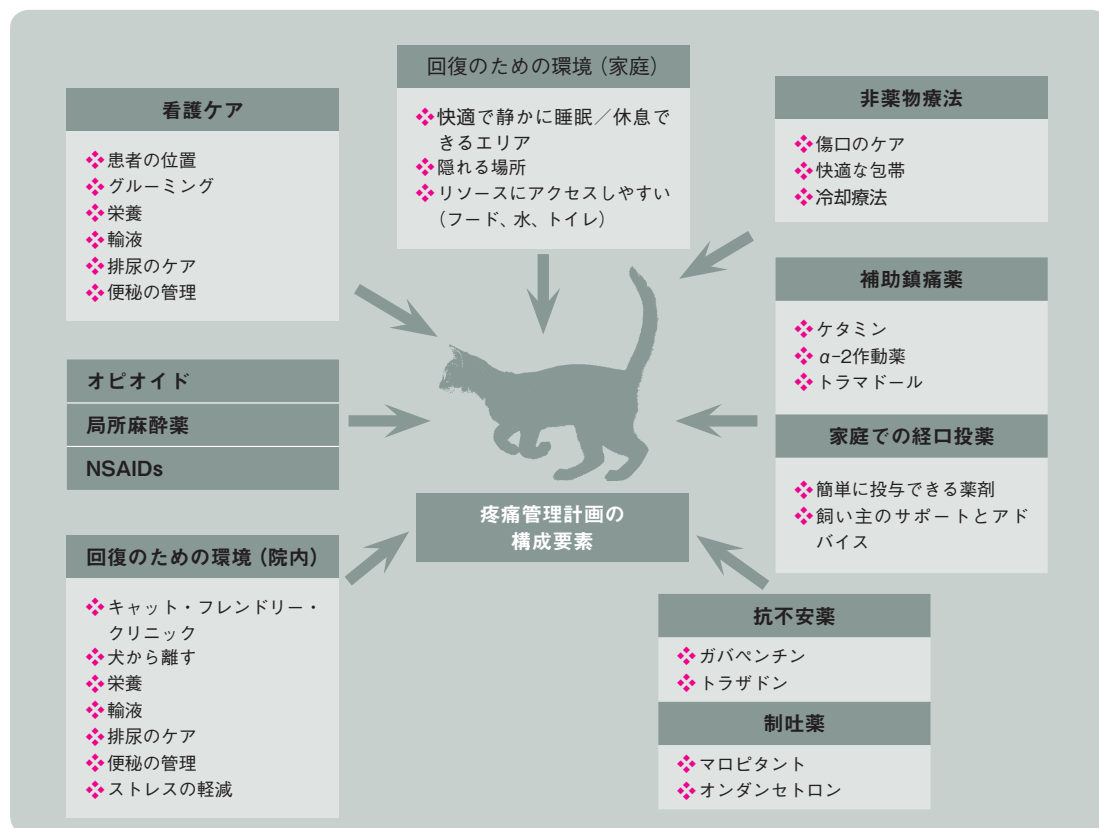

疼痛管理は単に鎮痛薬を投与するだけではない。猫の感情的なニーズも考慮しなければならず、患者は常に尊敬と共感を持って扱わなければならない。

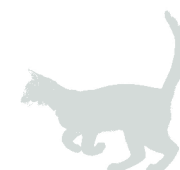

図9 急性期の疼痛管理を成功させるには、鎮痛薬の使用だけでなく、さまざまな要素を組み合わせることが基本である

治療は、疼痛刺激のタイプ、場所、程度と予想される期間、猫が入院患者なのか、外来患者なのかに基づいて決定する。鎮痛計画は頭文字を取った略語‘TELLS’（表5と図11）と呼ばれる概念に基づいて立てる。たとえば、選択的手技（猫の不妊/去勢手術）にともなう急性の内臓痛はNSAIDs、オピオイド、 $\alpha$ 2作動薬<sup>64,65</sup>、局所麻酔（例：睾丸内、切除部位、腹腔内、腹横筋平面〔TAP〕ブロック）で効果的に治療できる。整形外科手術あるいは脊椎/脊髄障害にともなう急性体性痛あるいは神経原性疼痛には、N-メチル-D-アスパラギン酸（NMDA）受容体拮抗薬（例：ケタミンやア

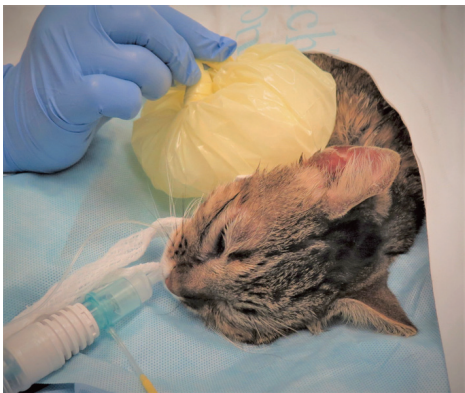

図10 外耳道全摘術後に氷嚢による療法を受けている猫。冷却療法は、効果的な鎮痛効果があり、手軽に利用できる非薬物療法の一例である  
画像はPaulo Steagallの厚意による

マンタジン）とガバベンチノイドが必要となることがある。

予想される痛みの持続期間と程度を決定し、個々の患者にとって最適な鎮痛薬を使用する。中程度から重度の痛みが長引く猫には、ブプレノルフィン<sup>66</sup>あるいはメタドンの間欠的な投与で疼痛管理を行うことができる。そのほかには、オピオイドやケタミン、あるいは両者の持続点滴投与（CRIs）がある。各クラスの鎮痛薬については後述する。

入院あるいは外来患者の性格が、投与頻度と投与経路に影響することがある。診療時間外や夜間に患者の世話をできるスタッフがいない、また退院させた患者には、長時間持続する経口鎮痛薬、徐放性鎮痛薬、経皮鎮痛薬に頼ることができる。

表5 疼痛管理に使用される主要な概念（TELLS）\*の具体的な例

|             | 例                                                      | コメント                                                                                                |
|-------------|--------------------------------------------------------|-----------------------------------------------------------------------------------------------------|
| 侵害刺激の種類     | 内臓、神経障害性、体性、口腔顔面、腫瘍                                    | 特定の鎮痛薬は、特定の種類の痛みに対してより効果的である場合がある。たとえば、末梢性または中枢性感作の治療に役立つ鎮痛薬（ケタミンやメタドンなど）は、神経障害性損傷の場合に適切な選択となることもある |
| 侵害刺激の予想持続時間 | 手術後の2時間未満の一過性刺激（尿道カテーテル挿入や内視鏡検査）と長時間持続する刺激（24-72時間）の比較 | これは疼痛評価の頻度や必要性に影響するはずである。鎮痛薬は作用時間に基づいて決定されることがある。入院と鎮痛薬の点滴が必要になる場合がある                               |
| 侵害刺激の場所     | 前肢、後肢、口腔顔面、腹部、胸腔内                                      | 局所療法を検討する際に有用である                                                                                    |
| 治療中の患者の位置   | 外来または入院患者                                              | 鎮痛薬の投与経路と頻度（投与計画）に影響する可能性がある。また、疼痛評価の頻度にも                                                           |
| 侵害刺激の重症度    | 軽度、中等度または重度                                            | 鎮痛薬クラスの用量と選択に影響を与える可能性がある                                                                           |

\*これらの概念は、使用する鎮痛薬の用量、頻度、種類、経路を決定するのに役立つ

図11 特定のタイプの痛みを持つ患者に対する急性期の疼痛管理に関する提案  
NSAID = 非ステロイド系消炎鎮痛薬  
NMDA = N-メチルD-アスパラギン酸塩

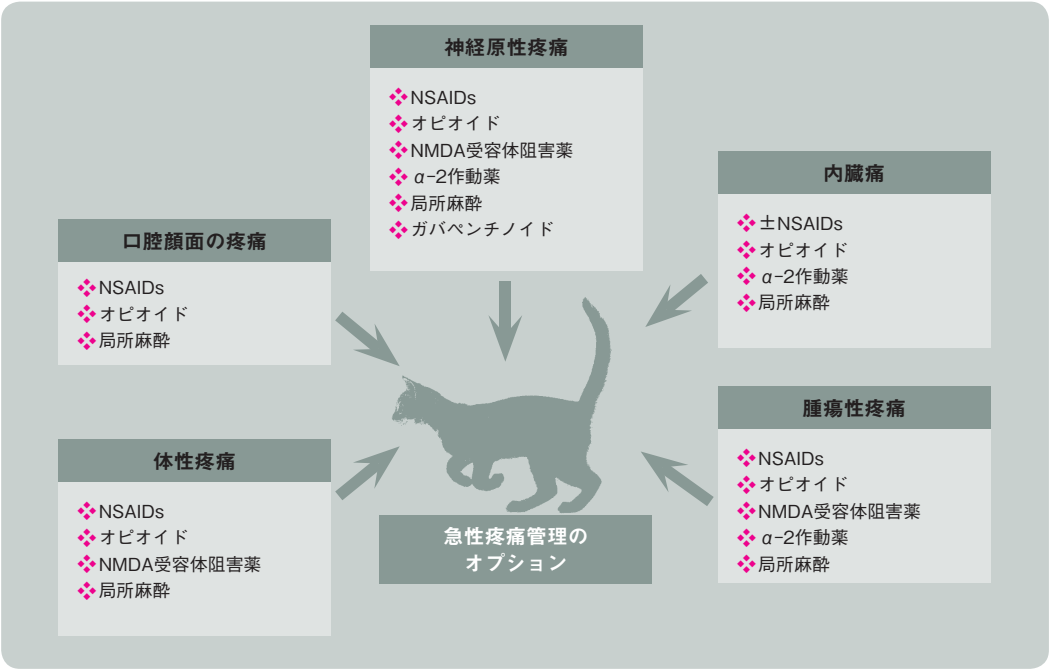

## 鎮痛計画の立案：実用的な検討事項

## ◆特定の処置に使用できる局所麻酔ブロックの種類

たとえば、局所麻酔法は効果的であり、後肢（坐骨および大腿神経ブロックまたは腰仙骨硬膜外麻酔）、前肢（腕神経叢または橈骨 [R]、尺骨 [U]、正中 [M]、筋皮部 [M] [RUMM] 神経ブロック）、腹部（TAPブロック、腹腔内鎮痛）、歯科（歯科神経ブロック）、胸部（肋間神経ブロック）などに使用できる（後述の「局所麻酔薬」を参照）。これらのテクニックのほとんどは、このガイドラインでは詳しく説明していないが、ほかの場所でレビューされている<sup>67,68</sup>。

## ◆手術の種類/痛みの状態によるオピオイドの選択

たとえば、 $\mu$ -オピオイド受容体の完全な遮断薬（例：メタドン、フェンタニル）は、用量依存的な鎮痛をもたらす、中程度から重度の疼痛に最適である。ブプレノルフィン（ $\mu$ -オピオイド部分作動薬）は、多剤併用鎮痛法の一環として軽度から中等度の疼痛に使用すること

ができる。ブトルファノールとナルブフィン（作動薬-遮断薬オピオイド）の鎮痛効果は限られている（下段の「オピオイド」の項を参照）。

## ◆NSAIDs使用の可能性

NSAIDs（例：メロキシカム、ケトプロフェン、ロベナコキシブ）の投薬が禁忌でない場合、これらの薬剤は優れた鎮痛薬であり、手術によって炎症が生じるため、ほとんどすべての急性周術期痛の鎮痛戦略に含めるべきである。

## ◆補助的な鎮痛薬の必要性

鎮痛補助薬（ケタミン、ガバペンチノイド、トラマドールなど）は、とくにNSAIDsが禁忌の場合、重度の急性疼痛の治療や術後の持続的な疼痛の予防のために投与する。

## ◆急性周術期痛の持続時間

急性周術期の痛みは、猫の入院期間を超えて続くことが多く、日常的に非経口から経口または経粘膜/経口鎮痛剤への移行が必要となる。

しかしながら、集中的なモニタリングと鎮痛薬が必要な患者は、可能であれば時間外のケア（例：鎮痛薬のCRIs、輸液療法、創傷ケア、モニタリング）ができる施設へ転送すべきである。

猫の鎮痛計画を立てる際に考えるべき実的な考慮事項を下段の囲み記事「鎮痛計画の立案：実的な検討事項」に概説する。

## 痛みの治療-鎮痛薬

## オピオイド

オピオイドは猫の急性痛に使用されることが多い<sup>14,69</sup>。この薬剤は末梢と中枢神経系に存在するオピオイド受容体に結合し、興奮性神経伝達物質の放出を減少させ、ニューロンのシナプス後膜を過分極させて<sup>70-73</sup>、求心性感覚ニューロンへの $Ca^{2+}$ の流入を阻害し、下行性の抑制性経路を活性化する。その結果として、抗侵害受容効果による鎮痛作用が得られる。

オピオイドの人気は、顕著な安全性、潜在的な可逆性、そして鎮痛効果に起因している。オピオイド

治療は  
鎮痛と快適性に  
フォーカスし、  
薬物有害反応を  
最小限に抑え、内分泌  
および生理学的な  
反応を防止する  
必要がある。

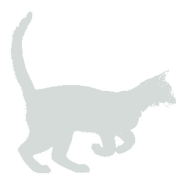

はさまざまな経路からの投与が可能であり、揮発性麻酔薬の最小肺泡濃度（MAC）を低下させることができ、全身麻酔中の心肺機能を改善する可能性がある<sup>74</sup>。しかし、非経口的あるいは硬膜外に投与された場合、猫でのMACを低下させる能力は、犬よりも低い<sup>75,76</sup>。たとえば、レミフェンタニルの高用量投与は、猫で最大25%まで<sup>77,78</sup>イソフルレンの必要量を減少させるが、犬では79%まで減少できる<sup>79</sup>。猫では、ケタミンの静脈内投与を加えることで、追加の麻酔薬を節約することができる<sup>80</sup>。

オピオイドの有効量では、散瞳、パーリング（ゴロゴロ鳴き）、前肢でのモミモミ、多幸感が起きる（下段の「猫とオピオイド：神話と誤解」を参照）。

表6にはよく使用されるオピオイド系鎮痛薬の推奨投与量と臨床的な関連性に関するコメント、利点と欠点について示した。オピオイド系鎮痛薬の選択は、患者のシグナルメント、気質、併発症、痛みの強度、必要な鎮静レベルを基にして決定し、また計画されている処置、オピオイド自体の薬理（作用の開始、程度、持続時間など）、獣医師がその場所で使用

## 猫とオピオイド：神話と誤解

オピオイドは、高用量で猫に脳、脊髄、副腎の自律神経中枢を介した交感神経反応を引き起こす<sup>81</sup>。これによって、散瞳、血圧と心拍数の上昇（高用量を使用した際の手術中にみられ、侵害受容刺激と混同されることがある）、同じように副腎静脈のホルモンレベル（すなわち、ノルアドレナリン、アドレナリン、ドバミン、メドエンケファリン<sup>81</sup>）が上昇する。意識のある猫に不

臨床的に適切な用量で投与された場合、  
とくにマルチモーダルな計画の一環としての  
オピオイドは猫に優れた鎮痛効果  
をもたらす、副作用がほとんどみられない  
ことが示されている。

必要に高用量のオピオイドを投与すると行動変化（例：恐怖、不安、発汗、不快感）が観察されることがあり「モルヒネマニア」という用語の元になった。しかし、複数の研究と臨床試験によって、臨床的に適切な用量で投与された場合、とくにマルチモーダルな計画

の一環としてのオピオイドは猫に優れた鎮痛効果をもたらす、副作用がほとんどみられないことが示されている<sup>82-87</sup>。

できる薬剤かどうかによって決まる。子猫と若い猫には、より頻回のオピオイド投与が必要となること  
がある。ある研究では、猫の年齢がオピオイドによ  
る熱的侵害抑制に影響を与えることがあると報告し  
ている<sup>88</sup>。具体的には、ヒドロモルフォンが9～12  
カ月齢よりも6カ月齢の猫で侵害抑制作用の時間が  
短く、また効果の程度が弱かった<sup>88</sup>。

投与経路

これまでオピオイドは、筋肉内（IM）あるいは静  
脈内（IV）に投与されてきた。鎮痛作用の発現、程度、  
持続時間は投与経路に影響され、個々に選択する必  
要がある<sup>89</sup>。IV投与は、確実な鎮痛作用と迅速な作  
用発現が期待できる。皮下（SC）投与では、IM投与  
に比べて注射の痛みが少ないが<sup>90</sup>、薬剤、投与量、製  
剤によって抗侵害受容の程度、持続時間にばらつき  
がみられる<sup>82-84</sup>。たとえば、猫にブプレノルフィン

| 表6 猫でよく使用されるオピオイド鎮痛薬とその投与量の目安、投与経路*（16ページへ続く）                                             |                 |                                                                       |                                                    |                                                                                                                                                                                                 |
|-------------------------------------------------------------------------------------------|-----------------|-----------------------------------------------------------------------|----------------------------------------------------|-------------------------------------------------------------------------------------------------------------------------------------------------------------------------------------------------|
| 急性疼痛管理の程度（例）                                                                              | 薬剤              | 投与量（指示されて<br>いる場合は mg/kg<br>または μg/kg）お<br>よび可能性のある<br>投与経路           | 鎮痛の持続時間                                            | コメント                                                                                                                                                                                            |
| 純粋なμ-オピオイド受容体アゴニスト                                                                        |                 |                                                                       |                                                    |                                                                                                                                                                                                 |
| 中等度から重度の痛み（整形外科手術、試験開腹術、膀胱切開術、卵巣子宮摘出術、神経原性疼痛、開胸術、大規模または複数の腫瘍摘出術、肺炎。ほかのクラスのオピオイドについて以下に示す） | モルヒネ            | ❖ 0.1-0.2 IV、<br>IMまたは硬膜外                                             | ❖ IVまたはIMの場<br>合は最長6時間<br>❖ 硬膜外麻酔の場合<br>は最長12-24時間 | IVはヒスタミン放出に注意し、ゆっくりIV。嘔吐と吐気は、とくにIMまたはSCで発生することが多い。硬膜外投与後に尿道閉塞が観察されることがある                                                                                                                        |
|                                                                                           | ヒドロモルフォン        | ❖ 0.025-0.1<br>IVまたはIM                                                | ❖ IVまたはIMで最<br>長6時間                                | 嘔吐と吐気は、とくにIMまたは SCで発生することが多い。オピオイドによる高体温は、高用量のヒドロモルホン単独あるいはほかの麻酔薬と併用して使用すると、より頻繁に発生する。体温の上昇は一般に軽度から中等度であり、自己制限的である（＜4時間）                                                                        |
|                                                                                           | メペリジン<br>（ペチジン） | ❖ 5-10 IM                                                             | ❖ 1-2時間                                            | ヒスタミン放出にともなう皮膚反応と低血圧が発生することから、IV投与すべきではない。鎮痛の持続時間は短く、用量依存적이다である。英国を含むヨーロッパ諸国でIM注射が承認されている                                                                                                       |
|                                                                                           | メタドン            | ❖ 0.2-0.6 IV、<br>IMまたはOTM                                             | ❖ 最長 6 時間                                          | NMDA受容体拮抗作用があり、末梢および中枢感作の治療に役立つ可能性がある。ヒドロモルフォンやモルヒネの投与と比較して、嘔吐と吐気は最小限である。高用量はOTM投与、低用量はIV投与である。英国、カナダ、イタリア、およびその他のヨーロッパ諸国で猫への使用が承認されている                                                         |
|                                                                                           | フェンタニル          | ❖ 5μg/kgのボー<br>ラス投与後、3-20<br>μg/kg/hの点滴静<br>注<br>❖ 25 μg/h の経<br>皮パッチ | ❖ 注入中のみ鎮痛を<br>提供<br>❖ 最長 72 時間                     | 低用量は鎮痛のために使用されるが、高用量では交感神経を同時に活性化する可能性があり、麻酔薬の節約効果（15-20%）も期待できる。猫にフェンタニルの経皮パッチ（ヒト用製剤）を使用した場合、血漿濃度が非常に変化しやすい。鎮痛効果は変動しやすく、最適でない場合もある。フェンタニル・パッチは、不快な刺激の18-24時間前に貼付する                             |
|                                                                                           | レミフェンタニル        | ❖ 6-40 μg/kg/h<br>IV                                                  | ❖ 注入中のみ鎮痛を<br>提供                                   | 低用量は鎮痛のために使用されるが、高用量では交感神経を同時に活性化する可能性があり、麻酔薬の節約効果（15-20%）も期待できる。レミフェンタニルのローディング用量は、手術刺激の15分前に開始すれば必要ない。オピオイド誘発性痛覚過敏に寄与する可能性がある。しかしながら、これは猫では確認されていない。肝代謝を必要としない。非特異的な血漿および組織コリンエステラーゼによる分解を受ける |

やヒドロモルフォンの推奨投与量をSC投与しても、鎮痛効果が劣ることがある<sup>84</sup>。一方、高濃度のブプレノルフィン（1.8 mg/mL; Simbadol, Zoetis）は米国食品医薬品局（FDA）から承認されており、SC投与後には最大24時間、軽度～中等程度の疼痛緩和が得られる（表6）<sup>85</sup>。この製剤はIV投与または口腔内粘膜経路（OTM）での投与も効果的で、最大8時間の鎮痛を提供する<sup>85</sup>。OTM経路は、非経口投与に代わる非侵襲的な方法である。肝臓での初回通過効

果をバイパスするため、経口投与より高い生物学的利用能が得られる。OTM経路でも鎮痛効果にばらつきがみられることから、術後の急性痛管理には、IMあるいはIV投与が望ましい<sup>82</sup>。

猫では、経皮フェンタニルパッチ（ヒト用製剤）は、適用後の血漿中薬物濃度が非常に変動しやすく、鎮痛効果が得られない可能性がある<sup>91,92</sup>。猫の薬物動態に関する予備的研究で、ブプレノルフィンの経皮マトリックスパッチは血漿中薬物濃度の変動が大

表6 猫でよく使用されるオピオイド鎮痛薬とその投与量の目安、投与経路\*（15ページの続き）

| 急性疼痛管理の程度（例）                                                             | 薬剤                                | 投与量（指示されている場合は mg/kg または μg/kg）および可能性のある投与経路 | 鎮痛の持続時間  | コメント                                                                                                                                                                                                                                                |
|--------------------------------------------------------------------------|-----------------------------------|----------------------------------------------|----------|-----------------------------------------------------------------------------------------------------------------------------------------------------------------------------------------------------------------------------------------------------|
| 部分的なμ-オピオイド受容体作動薬                                                        |                                   |                                              |          |                                                                                                                                                                                                                                                     |
| 軽度から中等度の痛み（去勢、卵巣子宮摘出術、小腫瘤の摘出、変形性関節症、内視鏡検査、尿道カテーテル設置、オピオイドの作動薬-拮抗薬は以下に示す） | ブプレノルフィン<br>- 標準製剤<br>(0.3 mg/mL) | ❖ 0.02-0.04 IV、IMまたはOTM                      | ❖ 最長8時間  | 標準製剤を用いたSC投与は推奨されない。ブプレノルフィン投与後にヒスタミン放出、嘔吐、悪心はない。とくにマルチモーダル鎮痛法の一環として、'ハンズオフ'鎮痛のためにOTM投与が可能である。両製剤ともNSAIDと併用することで、歯科治療や去勢手術に十分な鎮痛効果が得られる。単独の鎮痛薬として使用した場合、とくに大きな整形外科手術後の急性疼痛を緩和するには十分ではない。英国、カナダ、オーストラリア、その他の国々で、猫への使用が許可されている。高濃度製剤は米国でFDAにより認可されている |
|                                                                          | ブプレノルフィン<br>- 高濃度<br>(1.8 mg/mL)  | ❖ 0.24 SC                                    | ❖ 最長24時間 |                                                                                                                                                                                                                                                     |
| 混合μ-オピオイド受容体拮抗薬/K-作動薬                                                    |                                   |                                              |          |                                                                                                                                                                                                                                                     |
| 軽度の痛み、または診断処置ならびに鎮静（瀉血、膀胱穿刺、身体検査、針生検）を容易にするため）                           | ブトルファノール                          | ❖ 0.2-0.4 IV<br>または IM                       | ❖ 1-2時間  | 睾丸摘出術のマルチモーダルプロトコールで使用した場合、適切な鎮痛効果を発揮する。通常の外科手術に単独で使用する場合は、適切な鎮痛効果は得られない。高用量では、さらなる鎮痛効果は得られない。鎮痛作用の患者間変動が大きいことが報告されている。純粋なオピオイド受容体作動薬（0.02-0.05 mg/kg IV）を逆転させる場合、ナロキソンよりも抗侵害作用が残存するため、より良い代替薬となりうる                                                 |
|                                                                          | ナルブフィン                            | ❖ 0.15-0.3 IVまたはIM                           | ❖ 未定     | ブトルファノールが入手できない場合の代替品となる場合がある。急性疼痛管理の有効性を評価するための研究は数少ない。鎮痛を提供する用量はまだ決定されていない                                                                                                                                                                        |
| μ-オピオイド受容体拮抗薬（拮抗剤）                                                       |                                   |                                              |          |                                                                                                                                                                                                                                                     |
| 該当なし                                                                     | ナロキソン                             | ❖ 0.01-0.04 IV を 5 mLに希釈し、効果が現れるまでゆっくり投与     | NA       | 0.04 mg/kg IV の急速な投与は、精神低下や鈍麻を生じることがある（B Simon、個人的な観察）。60秒ごとに小刻みにゆっくり投与し、効果を確認する。鎮痛作用は反転するので、痛みが気になる場合はほかの鎮痛法や薬剤を検討する必要がある                                                                                                                          |

\* この表に記載されている投与量、薬剤、投与経路は提案であり、すべてを網羅したものではない。個体差があることを理解し、オピオイドはマルチモーダル痛の一環として投与するのがよい。鎮痛効果は痛みの種類、年齢、猫種、手術方法、麻酔時間、投与経路によって異なる可能性がある。臨床的な判断が重要である。獣医師は、動物用医薬品が入手可能であれば、医薬品の添付文書を参照する必要がある  
NA = 該当なし、IV = 静脈内投与、IM = 筋肉内投与、SC = 皮下投与、OTM = 経口粘膜投与、NSAID = 非ステロイド系消炎鎮痛薬、NMDA = N-メチル D-アスパラギン酸、FDA = 米国食品医薬品局

きく、熱的抗侵害を生じさせることができなかった<sup>93</sup>。

オピオイド単独（例：モルヒネあるいはブプレノルフィン<sup>94</sup>）の硬膜外投与では、わずかな副作用で<sup>97-99</sup>、固有知覚を変化することなく内臓痛<sup>95</sup>と体性痛<sup>96</sup>を効果的にコントロールできる。稀であるが、報告されているモルヒネの硬膜外投与後の副作用である尿道閉塞を避けるために、麻酔から開腹する前には、膀胱をやさしく圧迫しておく必要がある<sup>96,100</sup>。どのような鎮痛薬を投与するにしても、膀胱を空にすることで、回復初期の快適性を向上させることができるかもしれない。

### 薬剤の副作用

オピオイドのなかには、薬剤、投与量、投与経路によって副作用が認められることがある（表6）。オピオイド投与後には、悪心と嘔吐（図12）、胃食道逆流、体温上昇、抑うつ、散瞳（図12）、鎮静、迷走神経性徐脈、軽度の高炭酸ガス血症による呼吸抑制が観察されることがある。制吐薬（マロピタント、オンダンセトロン）、運動促進薬（メトクロプラミド）、鍼<sup>101</sup>の使用は、オピオイド投与による消化器（GI）の副作用を一部軽減あるいは治療することができる<sup>102-105</sup>。このようなGIの副作用は、メタドン、フェンタニル、ブプレノルフィンを選択すれば回避することができる。硬膜外へのオピオイド投与は、ほとんど副作用なく長時間の鎮痛効果が得られる<sup>98,99</sup>。ナロキソンやブトルファノールの投与は、オピオイド誘発性の副作用に拮抗することができる。このような状況では、鎮痛作用が低下し、拮抗する可能性があることから、ほかの鎮痛法を実施、検討する必要がある。

### 非ステロイド系消炎鎮痛薬

NSAIDsは猫に鎮痛、抗炎症、解熱効果があることから広く用いられており、術後疼痛のコントロールに不可欠である。使用前に禁忌となる事柄（消化器疾患、NSAID不耐、治療されていない腎疾患、肝疾患、凝固障害、脱水、低血圧、ほかのNSAIDsあるいはコルチコステロイドの投与）を除外しておく必要があるが、NSAIDsはマルチモーダル・アプローチの一部として、猫の急性痛の治療として極めて効果的である<sup>106-114</sup>。猫の急性痛の治療として推奨さ

れているNSAIDsの投与計画を表7にまとめた。

推奨投与量と投与間隔が守られていない、あるいはコルチコステロイドと組み合わせて投与された場合には、有害作用（GI刺激、タンパク漏出性腸症、腎毒性）が報告されている。毒性発現の初期にみられる徴候には、食欲不振、食欲低下、下痢、嘔吐などがある。しかしながら、副作用を恐れてNSAIDsの使用を省略することは推奨されておらず、使用しなければ疼痛管理が著しく損なわれる可能性がある。

投与は除脂肪体重に基づいて行い、薬剤の投与前には、脱水がないことが必須条件である。術後、患者によっては、NSAIDの長期投与が有効なことがあり、ケース・バイ・ケースで考慮する必要がある<sup>115</sup>。

メロキシカムとロベナコキシブは、嗜好性に優れていることから、治療コンプライアンスが良好であり<sup>113,117</sup>、また1日1回の投与であることから、猫が投薬を容易に受け入れる可能性が高い。注射製剤は周術期に使用することができ、国、地域によって、IV（適応外使用）あるいはSCで投与できる。経口投与は、術後と

家庭環境で行われている。数多くの研究が、周術期に異なるNSAIDsを用いたとしても、同等の鎮痛効果と持続時間が得られると報告している（すなわち、非劣性試験と比較試験）<sup>110,111,113</sup>。

NSAID投与のタイミングは、論議的的となっているテーマである。一般にNSAIDsは、健康な猫に中性化手術を行う場合、血圧をモニターし脱水がなければ、術前に投与することができる。より時間がかかる手術では、輸液療法が必要であり、血圧をモニターしNSAID投与のタイミングについて、それぞれリスクと利点を考える必要がある<sup>107</sup>。CKDなどの併発疾患がある猫へのNSAIDs投与は、11ページの‘猫の薬物代謝と排泄：鎮痛薬への影響’の項を参照のこと。

### 局所麻酔薬

局所麻酔薬は、末梢から脊髄と脊髄中心への侵害受容シグナルの変換と伝達を阻害することによって、優れた鎮痛効果を提供する<sup>118</sup>。ほかの抗侵害受容薬と比較すると、局所麻酔薬は完璧な鎮痛作用を提供するところがユニークである。局所麻酔はマル

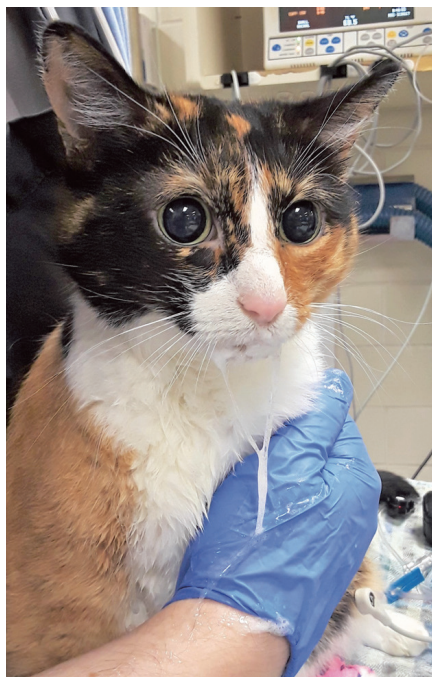

図12 ヒドモルフォン静脈内投与後の猫の散瞳と唾液分泌過多  
画像はBradley Simonの厚意による

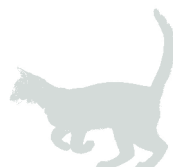

猫が受ける苦痛をともしう処置は、それぞれ相乗効果をもたらす可能性があり、苦痛とストレスを軽減するためにあらゆる機会を利用する必要がある。

表7 猫の急性疼痛管理に使用される一般的なNSAIDs \*

| COX 選択性† | 製剤                 | 用量、投与経路、頻度                                     | 投与情報                                  | 適用とコメント                                                                   | 参考文献    |
|----------|--------------------|------------------------------------------------|---------------------------------------|---------------------------------------------------------------------------|---------|
| メロキシカム   |                    |                                                |                                       |                                                                           |         |
| COX-2優先  | 注射薬；<br>5mg/mL     | 0.3mg/kg SC 1回                                 | 1度のみ投与                                | OVHおよび軽度の軟部組織手術後の術後鎮痛。これは米国で承認されている用量である。しかし、ガイドラインの委員は、以下のように低用量の使用を推奨する | 115     |
|          | 注射薬；<br>2mg/mL     | 0.2mg/kg SC 1回                                 | その後、0.05 mg/kg PO を<br>24時間ごとに4日間継続可能 | 軽度から中等度の術後疼痛                                                              | 115     |
|          | 経口懸濁液；<br>0.5mg/mL | 0.1 mg/kg PO 1日目。<br>その後、0.05 mg/kg<br>PO q24h | 無制限に投与可能                              | 慢性筋骨格系疾患における炎症および疼痛。これらはEUで承認されている用量である。長期的な治療には最小有効量を使用する必要がある           | 107、115 |
| ロベナコキシブ  |                    |                                                |                                       |                                                                           |         |
| COX-2選択的 | 注射薬；<br>20mg/mL    | 2 mg/kg SC q24h                                | 最長3日                                  | 軟部組織手術にともなう疼痛・炎症                                                          | 109、116 |
|          | 錠剤；<br>6mg         | 1 mg/kg PO q24h                                | 最長6日                                  | 筋骨格系疾患にともなう疼痛・炎症                                                          | 112、115 |
| ケトプロフェン  |                    |                                                |                                       |                                                                           |         |
| なし       | 注射薬；<br>10mg/mL    | 2 mg/kg SC q24h                                | 最長3日                                  | 筋骨格系などの疼痛性疾患にともなう急性の疼痛および炎症の緩和                                            | 115     |
|          | 錠剤；<br>5mg         | 1 mg/kg PO q24h                                | 最長5日；1日目は注射可能                         | ケトプロフェンの注射に同じ                                                             | 115     |

\* 獣医師は、NSAIDsを投与する前に、それぞれの国の医薬品ラベルを参照する必要がある  
† COX-2 優先 = COX-1 よりもCOX-2の抑制が大きい；COX-2 選択的 = COX-1の抑制が実質的にない  
COX = シクロオキシゲナーゼ、OVH = 卵巣子宮摘出術、SC = 皮下注射、PO = 経口注射

チモーダルな鎮痛療法の一部として重要であり、可能な限り鎮痛管理計画に取り入れるべきである。このような手法を計画に組み込んだ場合、麻酔維持と回復がスムーズになることが多い。そのほかの局所麻酔の利点には、低コスト、どの国でも実施可能、筋弛緩、注射麻酔薬と揮発性麻酔薬の必要量減少、翻って心肺機能の改善があげられる<sup>119-122</sup>。さらに、長時間作用の局所麻酔薬の効果は、術後まで延長し、ほかの薬剤の必要性を低減できる<sup>121, 123</sup>。近年、猫の抜爪術にリボソーム包埋型のブピバカインの使用が米国で承認され、術後の鎮痛薬として最大3日まで使用されることがある<sup>124</sup>。この製剤は切開手術の麻酔に適応外で使用されている（後述）<sup>124</sup>。

よく使用されている局所麻酔薬を表8にまとめて示した<sup>118, 125</sup>。局所麻酔の毒性は重度の神経症状、心肺停止、死である。したがって、投与量の計算は正確に行ってシリンジに吸引しなければならず、とくにブピバカインには心毒性があることから、サイズが小さな猫ではとくに重要である。注入前にシリンジの内筒を引いて陰圧をかけ、血液が吸引されたら針の位置を変えることで血管内への誤投与を回避することができる<sup>118, 125</sup>。局所麻酔に関して、もっとも

可能な限り、  
急性期の疼痛管理  
プロトコールには、  
NSAIDsを  
含める。

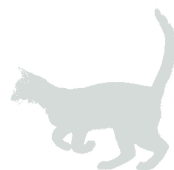

深刻な副作用は、心停止であり、脂肪乳剤 (lipid emulsion) の静脈内投与は、ブピバカインによる毒性を逆転させる可能性がある<sup>127</sup>。

猫の周術期の痛み、とくに整形外科手術や後肢断脚の際に、腰仙椎の硬膜外へ局所麻酔薬と組み合わせたオピオイドを投与することがある。猫では、脊髄と硬膜はそれぞれ第1仙椎 (S1) と第3仙椎 (S3) で終わっており、髄鞘の端は仙椎管内に位置している (図13)<sup>128</sup>。このような解剖学的特徴から、犬と比較して髄腔内投与の危険性が高い<sup>128</sup>。尿道閉塞を起こした猫には、腰仙部硬膜外注射の代用として、仙尾部硬膜外注射が用いられている (図14)<sup>129, 130</sup>。ブピバカインあるいはブピバカイン/モルヒネを用いた仙骨法では、プロポフォールの必要量を減らし、鎮痛時間を延長できる<sup>129</sup>。解剖学的ならびに超音波検査による研究では、猫の仙尾部硬膜外麻酔の針の深さは約0.6 cmであるのに対して、腰仙部では皮膚と黄色靱帯の距離は1cmと報告されている<sup>131</sup>。猫の硬膜外腔は狭いが、この手技は優れた周術期の鎮痛を提供し、安全に行うことができる。適切な解剖学的なランドマークを考慮して、無菌的な手技が必要である。

| 表8 猫の局所麻酔に使用される一般的な局所麻酔薬                                                                             |                      |                                                           |                   |
|------------------------------------------------------------------------------------------------------|----------------------|-----------------------------------------------------------|-------------------|
| 局所麻酔薬                                                                                                | 推奨最大用量               | 開始（分）                                                     | 期間（時）*            |
| リドカイン                                                                                                | 5 mg/kg              | 1-2                                                       | 1-2               |
| ロピバカイン                                                                                               | 3 mg/kg              | 10-15                                                     | 3-5               |
| ブピバカイン                                                                                               | 2 mg/kg              | 10-15                                                     | 4-6               |
| リボソームブピバカイン                                                                                          | 5.3 mg/kg            | 猫ではわかっていない。人では数分                                          | 24-72             |
| 局所麻酔クリーム（リドカイン2.5%とプリロカイン2.5%の共晶混合物）                                                                 | 1mL または 1g を無傷の皮膚に塗布 | 30-60（デクスメトミジンとオピオイドで鎮静した猫では、20分で反応が消失した <sup>126</sup> ） | 猫ではわかっていない。人では数時間 |
| この表の情報は、ガイドライン委員会の委員の意見が一致したものである<br>*局所麻酔の持続時間は、局所麻酔の方法、手技、注射部位、麻酔薬の濃度や量、感覚ブロックと運動ブロックの観点から異なる場合がある |                      |                                                           |                   |

局所麻酔と部分麻酔の選択的テクニック

猫では、高度な超音波ガイドテクニックなど、いくつかの局所麻酔テクニックが報告されており、解剖学的なランドマークの理解が深まり、安全性と有効性が向上している。これらのガイドラインは、猫の診療にすぐに選択できる、使いやすいテクニックであり、概要について紹介する（表9）。

局所の局所麻酔

局部麻酔は簡便で効果的な方法である。根治的な乳腺切除を行った猫についての研究では、0.9%の生理食塩水30 mL中にブピバカインを2 mg/kgで混合し、ガーゼを浸漬して局所へ塗布したところ、術後4時間後の疼痛スコアが減少したと報告している。

静脈内カテーテルの設置はマイナーな手技に思えるかもしれないが、猫は痛みをともなう手技を受けるたびに、その痛みが増していくことを覚えておく

必要があり、したがって、痛みやストレスを減らすために、あらゆる機会を利用する必要がある。局所の局所麻酔用のクリーム（リドカイン-プリロカイン。表9）は、静脈穿刺やカテーテル設置にともなう痛みとストレスを軽減する（図15）。これは全身に吸収されることはなく、メトヘモグロビン血症やその他の副作用は回避することができる<sup>126, 134-136</sup>。さらに、カテーテル設置の成功率が改善できる<sup>128</sup>。

切開部と腹腔内の鎮痛

最近、世界小動物獣医師会（WSAVA）のGlobal Pain Councilは、切開部（図16）と腹腔内（図17）の鎮痛テクニックについて、エビデンスを基にしたレビューを発表した<sup>137</sup>。読者は、使用する際の適応と推奨事項、制限についての詳細な論議の資料を参照されたい。これらのテクニックはマルチモーダルな疼痛管理に取り入れる必要がある<sup>132, 138-143</sup>。

精巣内ブロック

精巣内の局所麻酔は単純な方法であり、猫の去勢中に交感神経と血行動態を低下できる可能性がある（図18）<sup>120, 144, 145</sup>。この方法は、完全な抗侵害受容を得るために、切開部の局所麻酔と組み合わせて行う（図18b [針B]）。このテクニックは、精巣への注入と膨張が痛みをともなう可能性があることから、全身麻酔下あるいは深い鎮静下で行うべきである。

デンタルブロック

抜歯、口腔内腫瘍切除、バイ

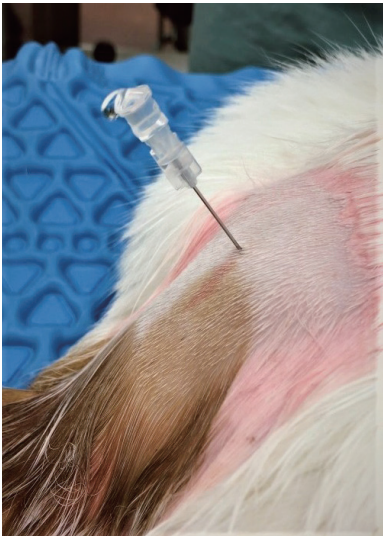

図14 尿道閉塞の猫への局所麻酔薬の仙骨硬膜外投与は、疼痛管理の適切な手段として使用することができる。この部位では脊髄液の漏れは起こりにくい、この画像に示しているように起こることもある  
画像はPaulo Steagallの厚意による

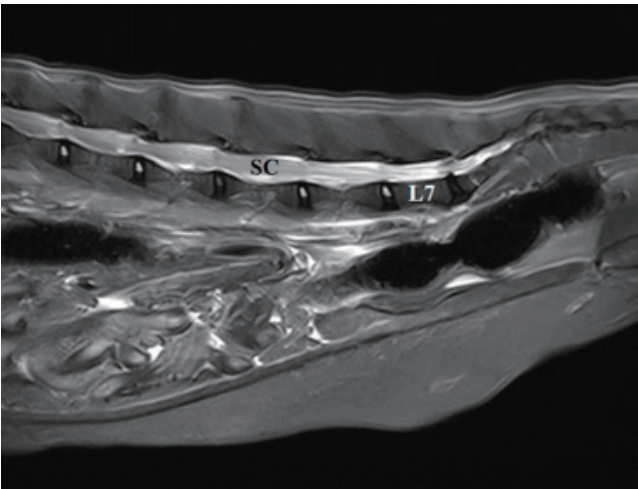

図13 猫の腰椎と仙椎の磁気共鳴画像。脊髄（SC）が第7腰椎（L7）より尾側に伸びていることに注意  
画像はWade Friedeck, Texas A&M University College of Veterinary Medicine & Biomedical Sciencesの厚意による

局所麻酔法の利点

—オピオイドの節約に加え、コストの低減、薬剤の入手しやすさ、筋弛緩、注射薬や揮発性麻酔薬の必要量の減少などである。

オブシー、上顎切除術、下顎切除術など、さまざまな歯科ならびに口腔内処置に使用できるブロック麻酔が数多くある。注入は25～27Gの注射針で行い、リドカインの投与量は、それぞれの神経に0.1～0.3 mLであるが<sup>25, 125, 146</sup>、総投与量のガイドラインを遵守する必要がある (mg/kg。図8)。最終的な注入量は実施した歯科ブロックの数によって異なる。とくに複数の部位に注入する場合には、投与した薬剤の量を注意深く追跡して計算しておく必要がある。

眼窩下神経ブロックを図19 (注射針A) と図20に示す。上顎神経は、下眼窩周囲を通して眼窩下管に入り、眼窩下神経となる<sup>147, 148</sup>。とくに短頭種の猫では、眼球を貫通する危険性があるため、注射針を眼窩下管に4～5mm以内で慎重に

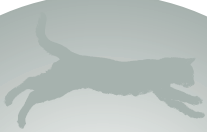

**ビデオ資料**

このガイドラインで説明されている局所麻酔や局所麻酔のテクニックは、その他の疼痛管理テクニックとともに、モントリオール大学獣医学部のYouTubeチャンネルで見ることができる：

[youtube.com/channel/UCaDaAco76nwBq7BWE0-dLcA/search?query=steagall](https://youtube.com/channel/UCaDaAco76nwBq7BWE0-dLcA/search?query=steagall)

また、Zero Pain PhilosophyのMatt Gurneyの好意により、[zeropainphilosophy.com/local-anaesthetic-videos](https://zeropainphilosophy.com/local-anaesthetic-videos)がある

挿入する必要がある<sup>149</sup>。尾側の歯 (すなわち前臼歯 #3と後臼歯 #1) に対するこの神経ブロックの有効性は、確立されていない<sup>147</sup>。尾側の歯に対する麻酔の代替方法として、上顎神経ブロックが行われてき

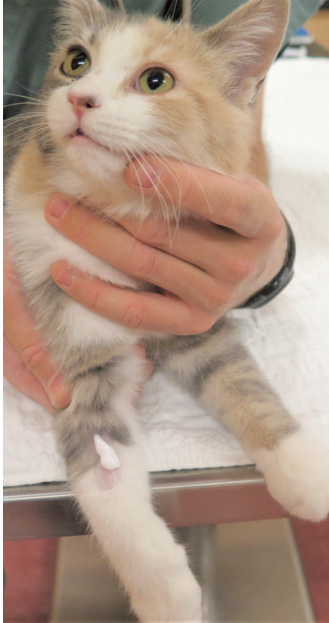

図15 局所麻酔薬 (リドカインとプリロカインクリーム) の混合物を使用して、静脈カテーテル留置前に皮膚の脱感作を行う。静脈穿刺の前に20～30分間、患部を閉塞性包帯で覆う。猫での副作用は報告されていない  
画像はPaulo Steagallの厚意による

| 表9 猫に使用される一般的な局所麻酔技術のまとめ                                                                          |                                         |                               |                                                                        |                                                                                                   |                                                                                                 |
|---------------------------------------------------------------------------------------------------|-----------------------------------------|-------------------------------|------------------------------------------------------------------------|---------------------------------------------------------------------------------------------------|-------------------------------------------------------------------------------------------------|
| 技術                                                                                                | 適応症                                     | 針                             | 局所麻酔薬の量*                                                               | ランドマーク                                                                                            | コメント                                                                                            |
| 局所麻酔 (リドカイン・プリロカインクリーム) (図15)                                                                     | 静脈穿刺またはカテーテル挿入にともなう痛みとストレス              | 該当なし (皮膚にクリームを塗布)             | 1 mL                                                                   | 静脈の上                                                                                              | 切り取った皮膚にクリームを塗り、閉塞包帯で覆う。開始を待つ - 鎮静剤を使用していない猫では 20-30 分                                          |
| 切開 (浸潤) 鎮痛 (図16)                                                                                  | OVH、去勢およびその他の外科的処置                      | 22-27G、1-1.5 インチ              | 1-2 mL または 0.4 mL/kg が推奨されているが、一般的にこれは切開の長さと同局所麻酔薬の濃度によって異なる           | 切開部                                                                                               | 切開前に行うことができるが、術後の鎮痛のために手術後にも行うことができる。長い切開/大きなポリウムが必要な場合は、局所麻酔薬を希釈することを勧める                       |
| 腹腔内鎮痛 (図17)                                                                                       | OVHおよびその他の腹部手術                          | 22G、1.16 インチのカテーテル (スタイレットなし) | 2 mg/kg 0.5% プリロカイン (0.4 mL/kg) を生理食塩水 0.9% (すなわち、0.8 mL/kg) で 1:1 に希釈 | 卵巢茎と子宮体尾部、または対象領域の 'スブラッシュ'                                                                       | 猫の最大推奨用量を超えないよう注意が必要 (表8)                                                                       |
| 精巣内ブロック (図18)                                                                                     | 去勢                                      | 25G、5/8インチ                    | 精巣当たり 0.1-0.25 mL                                                      | 各精巣の中心に                                                                                           | 睾丸が固くなる。切開浸潤との併用を推奨                                                                             |
| 歯科ブロック：眼窩下 (図19 [針A] および20) 下歯槽 (下顎) (図19 [針B] および21)                                             | 歯のクリーニング、抜歯、縫合、骨折の修復、口腔塊の除去、上顎および下顎骨の切除 | 25G、5/8インチまたは27G、0.5 インチ      | 各神経で 0.1-0.3 mL (通常は1部位当たり 0.2 mL)                                     | 眼窩下 小臼歯 3 の上、眼窩下管 (4-5mm) に入る。猫の眼窩下管は短く、針は眼球に侵入しないように注意して導入する必要がある。下歯槽 (下顎) 下顎孔の方向で下顎の内側に対する下顎の角度 | 眼窩下皮膚、歯および背側鼻腔を含む吻側上顎骨の硬組織および軟組織への神経支配をブロックする。下歯槽 (下顎) 歯、下唇、舌の一部、および硬組織および軟組織を含む下顎骨の神経支配をブロックする |
| この表の情報は、ガイドライン委員会の委員の意見が一致したものである。<br>* 毒性を避けるために、使用されている特定の薬物の最大推奨用量については、表8を参照のこと。OVH = 卵巢子宮摘出術 |                                         |                               |                                                                        |                                                                                                   |                                                                                                 |

たが、眼球を貫通するリスクがあると報告されていることから、現在では推奨されていない<sup>150, 151</sup>。

下歯槽（下顎）神経（図19 [注射針B]、図21）は、下顎骨突出部の内側面にある下顎孔から下歯槽に入る<sup>121, 148</sup>。下顎腫瘍の猫にプビバカインの下歯槽（下顎）麻酔後で心血管虚脱が報告されている<sup>152</sup>。これは腫瘍近くに注射したことで、プビバカインの吸収が急速で、血漿中で中毒濃度に達した可能性がある<sup>152</sup>。

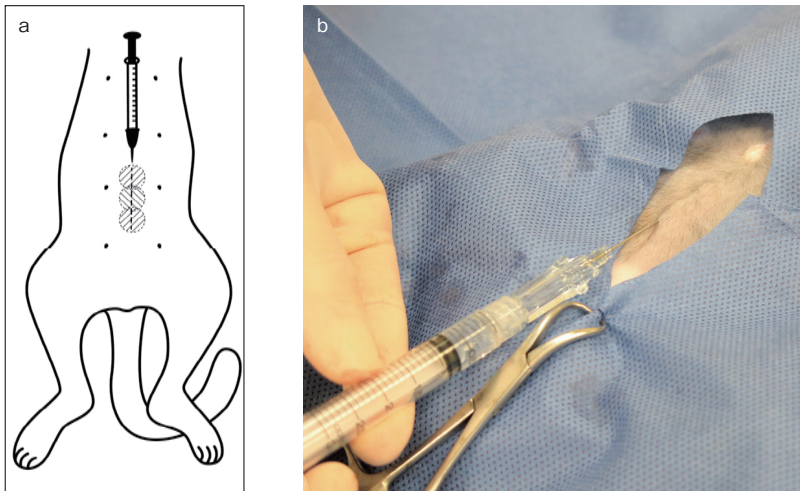

図16 切開線の皮下に局所麻酔薬を浸潤させ、手術前または手術終了時に切開部の麻酔を行う (a, b) 画像aはYael-Shilo Benjamini、画像bはPaulo Steagallの厚意による

## 鎮痛補助薬

❖**α2作動薬**は筋弛緩作用といくらか鎮痛作用もあることから、麻酔前投薬、鎮静、薬剤による保定法として、周術期に有用である<sup>153</sup>。鎮静と抗不安作用は、全体的な‘痛みの経験’を軽減する可能性がある。この薬剤は、α2アドレナリン受容体に高い特異性を持ち、キシラジンよりも好んで用いられる。α2作動薬は‘単独’の鎮痛薬としてではなく、むしろマルチモーダルなプロトコルに組み入れるべきである。とはいうものの、使用は心肺機能が安定している猫に限定すべきである。α2アドレナリン受容体の拮抗薬（例：アチパメゾール）は、薬物の作用を反転させるために常備しておくべきであり、回復が長引いた場合や心血管虚脱が認められた場合に必要となる。

❖**メタミゾール (dipyrone)** は、フェノール化合物であり、COX-1といくらかCOX-2にも作用する非NSAIDであり、抗炎症活性を持つ<sup>154</sup>。この薬剤は、COX-3酵素の中枢性阻害によると考えられている強力な鎮痛効果を持つ<sup>155</sup>。オピオイドとカンナビノイド系の活性化も、メタミゾールの作用メカニズムである可能性がある<sup>156</sup>。とくに南米では、卵巣子宮摘出術を受ける犬や猫の周術期の疼痛管理に使用される人気の高い鎮痛薬である<sup>154, 157, 158</sup>。猫におけるメタミゾールの2つの主要な代謝物の薬物動態は、それぞれIV、IM、PO投与（25 mg/kg）で解説され

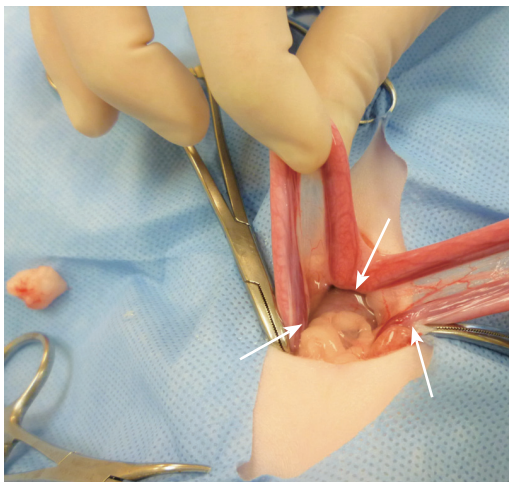

図17 卵巣摘出/卵巣子宮摘出術などの腹部手術の前に行われる局所麻酔薬の腹腔内投与。作用時間の長い局所麻酔薬（プビバカインなど）を使用し、液剤を3回に分けて、3mLの注射器で左右の卵巣茎状突起と子宮体部尾側（矢印）に‘噴霧’する。この溶液はすぐに腹膜に吸収される。プビバカイン（2mg/kg）を卵巣吊り靱帯および血管、子宮体部、切開部皮下組織に注射する方法も記載されている<sup>132</sup>。対照群に比べ術後疼痛スコアが低く、大型の猫（>2.7kg）でもっとも有効であった  
画像はPaulo Steagallの厚意による

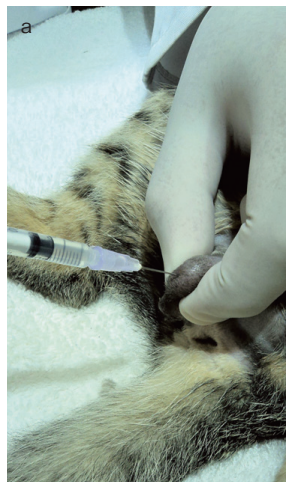

図18 精巣内ブロック。針を睾丸の中心に刺し、睾丸1個当たり0.1-0.25mLの局所麻酔薬を注入する (a; b [針A])。注入中精巣は固くなる。精巣内注入は、陰囊の両側で行う皮下切開浸潤と併用することができる (b [針B])。精巣が大きい場合には高用量、子猫の場合は低用量で投与する (c) 画像aとcはPaulo Steagall、画像bはYael-Shilo Benjaminiの厚意による

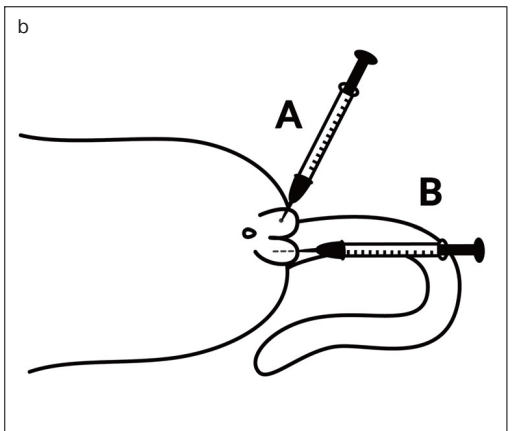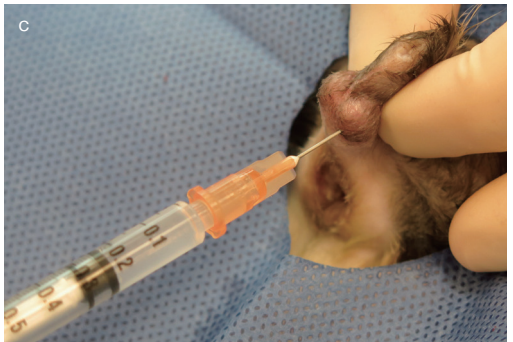

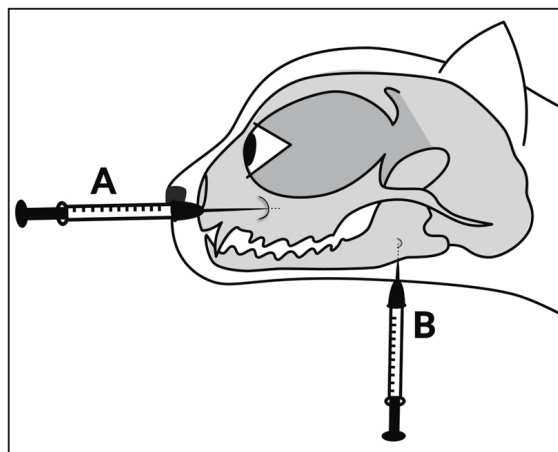

図19 眼窩下神経ブロック(針A)、下歯槽(下顎)神経ブロック(針B)の位置。図20と図21にそれぞれの手技を写真で示す  
画像はYael-Shilo Benjaminiの厚意による

ている<sup>159</sup>。IVおよびIM投与後、それぞれ6頭中4頭と2頭の猫で流涎と嘔吐が観察されていた。しかし、その後の研究では、メタミゾールのIV投与(25 mg/kg 8、12、24時間ごと)で、これらの副作用は報告されていない。実際、卵巣子宮摘出術を行った猫でハインツ小体の形成、生化学的プロファイル、酸化マーカーについて、臨床的に関連する影響はなかったが、この研究で、注射用のトラマドールを組み合わせて投与された猫に、追加の鎮痛効果は認められていない<sup>158</sup>。別の研究では、卵巣子宮摘出後の猫にメタミゾールを家庭で経口投与(滴下)したところ、流涎がみられたと報告されており、12.5 mg/kg 1日1回あるいは25 mg/kg 1日1回投与した猫の一部には、追加の鎮痛薬が必要であり、単剤による治療(メロキシカムと同様)では、十分な鎮痛効果が得られないことがある<sup>154</sup>。

◆**ガバペンチン**は、電位依存性カルシウム・チャンネルに結合するが、下行性ノルアドレナリン抑制系の活性化を

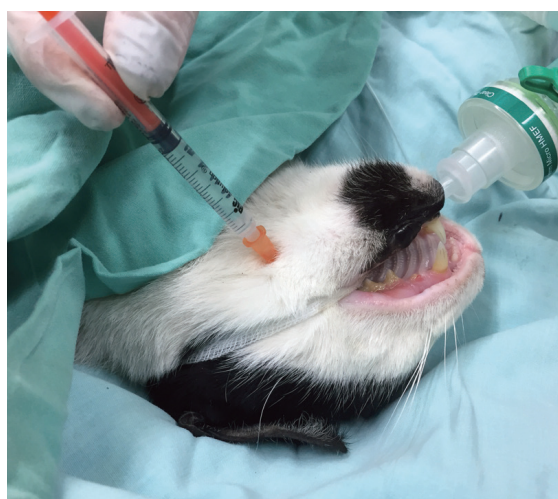

図21 口腔外アプローチによる下歯槽(下顎)神経ブロック。針は顎下角の皮膚面に対して垂直に刺入し、下顎孔の方向に下顎骨内側を約5mm前進させる  
画像はYael-Shilo Benjaminiの厚意による

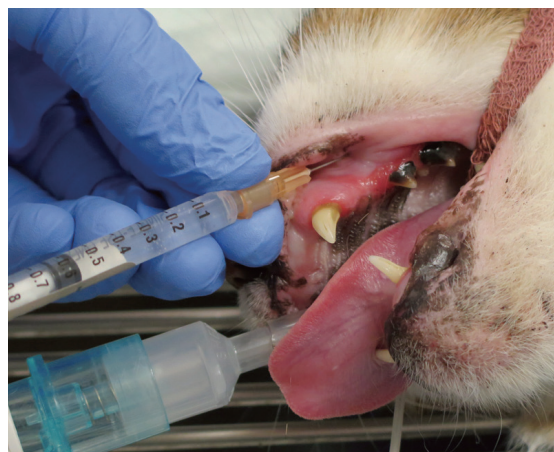

図20 眼窩内神経ブロック前臼歯3番のレベルで、眼窩下管に約4~5mm、頭側から尾側方向へ針を刺入する  
画像はPaulo Steagallの厚意による

含めた作用メカニズムが確認されている<sup>160</sup>。この薬剤は、猫に10 mg/kgの経口投与で、高い生物学的利用能を示し、血漿中濃度のピークは、45分~2時間であり、消失半減期は3~4時間と報告されている<sup>161,162</sup>。また繰り返し投与しても、終末半減期とほかの薬物動態パラメーターには、影響がないと報告されている<sup>161</sup>。

薬剤の経皮投与は、猫の経口投与に代わる魅力的な方法である。薬剤を混合する基剤の選択は、猫の皮膚に浸透する必要があることから重要である。ある研究では、ガバペンチンを粉末にして、エトキシグリコール溶媒と経皮基剤(Lipoderm、Professional Compounding Centers of America)と混合した場合、有意な経皮吸収が認められなかったと報告している<sup>161</sup>。しかし、別の研究では、独自の基剤であるLipodermと混合したガバペンチンは、測定可能な血漿濃度が認められたと報告している<sup>163</sup>。後者の著者らは、適用した猫の頭数が少なく、グルーミングを制限しなかったことから、粘膜を経由して摂取した可能性があるとしている。ほかの経皮クリーム、濃度、用量、投与回数を用いたさらなる研究が必要である。

急性疼痛の管理に対するガバペンチンの使用に関しては、限られた情報しかない<sup>35,55,164</sup>。ある研究では、卵巣子宮摘出術を行った猫にガバペンチン(50 mg PO 術前の12時間前と1時間前)をブプレノルフィンと併用した場合、メロキシカムやブプレノルフィンと同程度の術後鎮痛が得られたと報告している<sup>35</sup>。猫の鎮痛目的でガバペンチンを使用するには、さらなる研究が必要である。ガバペンチン(50 mgまたは100 mg PO)は、飼い猫やケージ・トラップされた地域猫が、輸送や獣医師の診察を受ける際のストレス軽減と恐怖反応を軽減させるのに重要である<sup>60,165</sup>。

◆**ケタミン**は、NMDA受容体を非競合的かつ非特異的に拮抗することによって、麻酔下用量で抗痛覚過敏効果を発揮する<sup>57,166</sup>。これらの受容体は、脊髄後角における興

奮性と持続性の神経伝達に重要である。NMDA受容体は、中枢性感作（表4）と累積的な脱分極の発生と維持に関与している。したがって、ケタミンの使用は麻酔薬やオピオイドを節約できるため、大きな外傷を負った猫や手術を受ける猫の痛覚過敏や異痛症を予防、治療するのに使用される<sup>55,80</sup>。長期間（数日間）の治療を受ける猫は入院する必要がある、その間は痛みを適切にモニターすべきである。推奨されている投与量は以下のとおりである：静脈内の導入量は0.15～0.3 mg/kg、その後2～10 µg/kg/分の点滴投与である。

❖**トラマドール**は、弱い合成オピオイド作動薬であり、セロトニンとノルアドレナリンの再取り込みを阻害（二重作用）する鎮痛薬である。注射製剤は、一部の国、とくに南米でよく使用されているが、北米、オセアニア、ヨーロッパのほとんど国では、経口製剤しか入手できない。しかし、嗜好性（苦味）が低いことから、猫の周術期鎮痛薬として普及しなかった。猫にこの薬剤を経口投与すると、大量の唾液を分泌し、投薬コンプライアンスも低い。さらに、患者間の鎮痛効果と副作用に大きなばらつきがある。トラマドールの注射製剤の投与は、前投薬としてアセプロマジンやデクスメトミジンと併用されることが多い<sup>167,168</sup>。

猫におけるトラマドールの薬物動態を基にすると、マルチモーダルな鎮痛計画の一部として、4 mg/kg、6時間ごとの経口投与が推奨される<sup>169</sup>。しかしながら、トラマドールは臨床的な鎮痛効果を生じないという報告もあることから、痛みの評価を常に行うべきである<sup>167</sup>。セロトニン阻害薬（例：フルオキシセチンとトラゾドン）、モノアミン酸化酵素阻害薬（例：セチリジン）や三環系抗うつ薬（例：クロミプラミン）をトラマドールと併用した場合には、セロトニン中毒のリスクが懸念される。セロトニン中毒の臨床徴候は、神経筋活動の更新、頻脈、発熱、呼吸促進と興奮である<sup>170</sup>。

猫におけるガバペンチノイドの鎮痛特性を調べるには、さらなる研究が必要である。

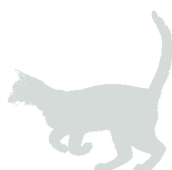

## 鎮痛薬の不足と入手困難： オピオイド・フリーあるいは オピオイドを節約するテクニック

オピオイドは、WSAVAの犬と猫に必須な薬剤リストに含まれており、‘核となる薬剤’と考えられている<sup>171</sup>。しかしながら、獣医師はオピオイドの不足に直面することが多く、厳しい規制や法的な制約があることから、この種の薬剤は常に利用可能というわけではなく、またヒト用と表示されていることから、動物の患者への投与が許可されていないことが多い。これらの製薬は、猫の疼痛治療を行う獣医師に影響し、外科的あるいは内科的処置が行われる際の周術期鎮痛が制限あるいは行うことができないことになり、猫の福祉にとって大きな問題となりうる。

‘オピオイド・フリー麻酔（OFA）’は、周術期にオピオイドを投与せず、非オピオイドによるマルチモーダルな鎮静テクニックによる診療のことを指す。‘オピオイドを節約した麻酔’は、少し制限のないテクニックであり、少量のオピオイドを使用する（すなわち、周術期に単回あるいは低用量のオピオイドを使用）。この2つのテクニックとも、呼吸抑制や死亡といったオピオイドに由来する副作用を避けるために、人医療で研究が進められている<sup>172-174</sup>。副作用は猫と人で異なるが、猫のOFAの研究は、今後のオピオイド不足を克服し、オピオイドに由来する副作用（嘔吐、抑うつ、高体温など）を軽減するために不可欠である。また、これまで鎮痛薬を使用せずに行われることが多かった不妊手術プログラムにおける疼痛管理について、人医療の解決策を参考にすることが急務である。

とくに猫では、この件に関する獣医学文献が不足している。ある研究では、ケタミン、ミダゾラムとデクスメトミジンをを用いた麻酔プロトコールに、ブピバカインの腹腔内投与と術後のメロキシカム投与では、研究に供試した猫の半分以上で、最適な術後鎮痛が得られなかったと報告している<sup>175</sup>。この研究は、オピオイドを基にした鎮痛グループとOFAグループを比較して行っているわけではなく<sup>175</sup>、‘オピオイドなしで、急性疼痛を減弱あるいは改善できるのか？’という疑問は残る。確かに、臨床現場で猫に認可されているオピオイド系鎮痛薬は、オピオイド不足を回避するため、そして猫の福祉を改善するために非常に重要である。この問題は、政府機関、産業界、規制当局、獣医専門職に限らず、複数の利害関係者が関与することによって解決するのがベストである。

## 気分不良の猫へのトラブルシューティング

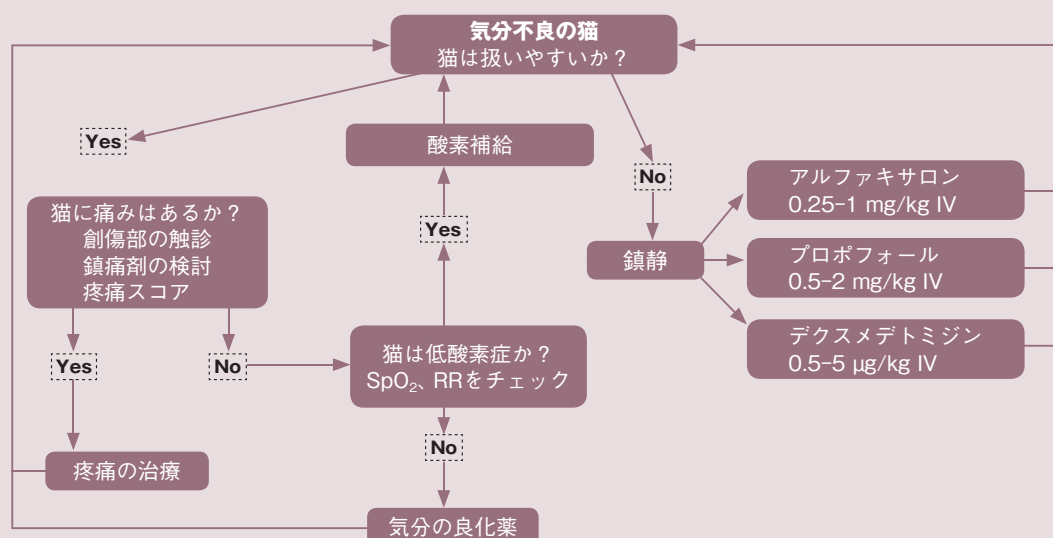

このアルゴリズムは、2018年7月にJFMSに掲載されたAAFP Feline Anesthesia Guidelinesであり、  
catvets.com/guidelinesから入手可能である。

IV＝静脈内投与、RR＝呼吸数、SpO<sub>2</sub>＝動脈血中のヘモグロビン飽和度

## 知識のギャップと課題

痛みに関連した猫の行動をさらに理解することが必要なと同様、家庭環境で効果が持続し、飼い主が投与しやすい鎮痛薬を持って猫が退院できるよう、急性期における長期的な疼痛管理テクニックが必要である。オピオイド・フリー麻酔テクニックとガバペンチノイドの役割は研究すべき重要なものである。子猫に対する鎮痛薬の必要性はほとんどわかっておらず、この年齢層でのさらなる研究が必要である。また、*in vitro*の研究と臨床の間のギャップを埋めるために、*in vivo*での局所麻酔テクニックの安全性と有効性の研究が必要である。猫の鎮痛に関する獣医学教育カリキュラムには大きなギャップが

## 読者への注意事項

本ガイドラインの情報の解釈に関する最終的な責任は、獣医師が負うものとなります。

本ガイドラインは、製品の使用方法について記載されている場合があります、読者自身の国においてかかわらずしも利用できない、または利用が許可されていない処方、方法または技法があります。

あり、猫の診療に疼痛評価ツールを使用するための協調努力が必要である。

## 補足資料

以下のファイルがオンラインで公開されている。

- ❖違和感のトラブルシューティングアルゴリズム
- ❖猫の介護者ガイド：‘猫の急性痛の認識と管理：飼い主/介護者向け情報’（付録参照）。

これらのファイルはjfms.com (DOI:10.1177/1098612X2110662680) で入手可能である。猫の介護者ガイドは、さらに [icatcare.org/advice/cat-carer-guides](https://icatcare.org/advice/cat-carer-guides) から入手できる。

## 要約ポイント

- ❖猫の急性疼痛の管理に関する2022年版ISFMコンセンサスガイドラインは、鎮痛に関連する猫の解剖学、生理学、薬理学の興味深い特徴や疼痛評価ツール、新しい鎮痛薬の使用法とテクニックについての最新情報を提供している。
- ❖疼痛管理の原則は、予約的鎮痛と薬物的および非薬物的選択肢を取り入れたマルチモーダル鎮痛を含んでいる。猫に優しいハンドリング・テクニックの実践、抗不安薬、介護ケアは、適切な疼痛管理を行う中心となる。
- ❖局所麻酔薬、NSAIDs、オピオイドに加えて、個体やその必要性に応じて補助的な鎮痛薬を検討する必要がある。
- ❖猫の飼い主が家庭環境で痛みを感知できるような急性痛評価ツールの自動化、周術期の痛みをコントロールする新しい鎮痛薬の認可、新しい鎮痛薬と技術の研究など、猫の痛みの管理は将来的に明るいと言える。
- ❖知識と実践の間にギャップはあるが、研究支援、教育の機会、熱心な猫の支持者たちによって、これらの問題に取り組むことができるのは良いニュースである。

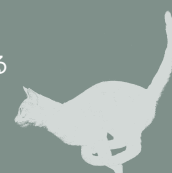

## 謝辞

ISFM は、本ガイドラインの作成に協力いただいた Dr Sabine Marangoni に、また図 16a、18b、19 の作成に協力いただいた Nirit Roth-Benyamini に感謝の意を表する。

## 利益相反

Paulo V Steagall は、Boehringer Ingelheim、Dechra、Elanco、Nexyon、Vetoquinol および Zoetis にコンサルティングサービスを提供し、謝礼を受けている。Sheilah Robertson は、Elanco および Zoetis にコンサルタント業務を提供し、彼らから謝礼を受けている。パネルのほかのメンバーに申告すべき利益相反はない。

## 資金援助

著者は、本論文の研究、執筆、出版に関して金銭的支援を受けていない。

## 倫理的承認

本研究は動物を使用しないため、JFMS に掲載するための倫理的承認はとくに必要ない。

## インフォームド・コンセント

本研究は、動物（死体を含む）の使用をとまわらないため、インフォームド・コンセントは不要である。また、本書で個人を特定できる動物や人については、関係者からインフォームド・コンセント（口頭または書面）を得ている。

## 承認

ISFM は、米国猫開業医協会 (AAFP) による本ガイドラインの支持を歓迎する。

## 参考文献：

- 1 American Veterinary Medical Association. U.S. pet ownership statistics. <https://www.avma.org/resources-tools/reports-statistics/us-pet-ownership-statistics> (2020, accessed 20 November 2021) .
- 2 Canadian Veterinary Medical Association. Veterinary demographics (2020) . <https://www.canadianveterinarians.net/about/statistics> (2021, accessed 15 July 2021) .
- 3 Steagall PV, Monteiro BP and Taylor PM. A review of the studies using buprenorphine in cats. *J Vet Intern Med* 2014; 28: 762–770.
- 4 Bortolami E and Love EJ. Practical use of opioids in cats: a state-of-the-art, evidence-based review. *J Feline Med Surg* 2015; 17: 283–311.
- 5 Steagall PV and Monteiro BP. Acute pain in cats: recent advances in clinical assessment. *J Feline Med Surg* 2019; 21: 25–34.
- 6 Robertson S. How do we know they hurt? Assessing acute pain in cats. *In Pract* 2018; 40: 440–448.
- 7 Reid J, Scott EM, Calvo G, et al. Definitive Glasgow acute pain scale for cats: validation and intervention level. *Vet Rec* 2017; 180: 449. DOI: 10.1136/vr.104208.
- 8 Evangelista MC, Watanabe R, Leung VSY, et al. Facial expressions of pain in cats: the development and validation of a Feline Grimace Scale. *Sci Rep* 2019; 9: 1–11. DOI: 10.1038/s41598-019-55693-8.
- 9 Belli M, de Oliveira AR, de Lima MT, et al. Clinical validation of the short and long UNESP-Botucatu scales for feline pain assessment. *PeerJ* 2021; 12: 9. DOI: 10.7717/peerj.11225.

## 免責事項

“2022年猫の急性疼痛管理に関するISFMコンセンサス・ガイドライン”の翻訳は、難波信一先生（マール動物医療センター、JSFMねこ医学会アドバイザー）のご厚意により提供されました。オリジナル版および猫医療に関する各種ガイドラインは、以下のアドレスからダウンロードができます。

オリジナル版：

<https://journals.sagepub.com/doi/full/10.1177/1098612X211066268>  
Guidelines articles from the AAFP and ISFM :

<https://journals.sagepub.com/page/jfm/collections/guidelines/index#5>

この出版物は、オリジナルの英語版の完全かつ忠実な翻訳を意図している。著者、編集者、学会 (AAFP および ISFM) および出版社 (SAGE Publications) は、この翻訳における誤りや脱落に 対しても、いかなる法的責任を負わないものとする。学会および出版社は、ここに含まれる資料に関して明示または黙示の保証を行わず、記事の翻訳中に生じたいかなる誤りについても責任を負わない。

## 付録

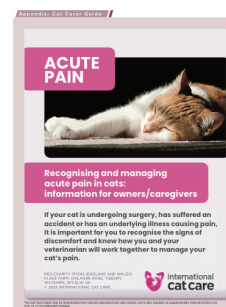

猫ケアガイド (The Cat Care Guide) :

[icatcare.org/advice/cat-carer-guides](https://icatcare.org/advice/cat-carer-guides) および補足資料 ([jfm.com](https://jfm.com)) も入手可能である。DOI: 10.1177/1098612X211066268

- 10 Holden E, Calvo G, Collins M, et al. Evaluation of facial expression in acute pain in cats. *J Small Anim Pract* 2014; 55: 615–621.
- 11 Steagall PV, Monteiro BP, Ruel HLM, et al. Perceptions and opinions of Canadian pet owners about anaesthesia, pain and surgery in small animals. *J Small Anim Pract* 2017; 58: 380–388.
- 12 Simon BT, Scallan EM, Von Pfeil DJF, et al. Perceptions and opinions of pet owners in the United States about surgery, pain management, and anesthesia in dogs and cats. *Vet Surg* 2018; 47: 277–284.
- 13 Rae L, MacNab N, Bidner S, et al. Attitudes and practices of veterinarians in Australia to acute pain management in cats. *J Feline Med Surg*. Epub ahead of print 20 September 2021. DOI: 10.1177/1098612X211043086.
- 14 Hunt JR, Knowles TG, Lascelles BDX, et al. Prescription of perioperative analgesics by UK small animal veterinary surgeons in 2013. *Vet Rec* 2015; 176: 493. DOI: 10.1136/vr.102834.
- 15 Coleman DL and Slingsby LS. Attitudes of veterinary nurses to the assessment of pain and the use of pain scales. *Vet Rec* 2007; 160: 541–544.
- 16 Simon BT, Scallan EM, Carroll G, et al. The lack of analgesic use (oligoanalgesia) in small animal practice. *J Small Anim Pract* 2017; 58: 543–554.
- 17 Rodan I, Sundahl E, Carney H, et al. AAFP and ISFM feline-friendly handling guidelines. *J Feline Med Surg* 2011; 13: 364–375.
- 18 Feline Grimace Scale. Pain assessment in cats. <https://www.felinegrimacescale.com> (2020, accessed 18 November 2021) .

- 19 Animal Pain. <http://www.animalpain.com.br/en-us/> (2012, accessed 19 July 2019) .
- 20 New Metrica. Acute pain measurement. <https://www.newmetrica.com/acute-pain-measurement/> (2019, accessed 19 July 2021) .
- 21 Cambridge AJ, Tobias KM, Newberry RC, et al. Subjective and objective measurements of postoperative pain in cats. *J Am Vet Med Assoc* 2000; 217: 685–690.
- 22 Smith JD, Allen SW, Quandt JE, et al. Indicators of postoperative pain in cats and correlation with clinical criteria. *Am J Vet Res* 1996; 57: 1674–1678.
- 23 Smith JD, Allen SW and Quandt JE. Changes in cortisol concentration in response to stress and postoperative pain in client-owned cats and correlation with objective clinical variables. *Am J Vet Res* 1999; 60: 432–436.
- 24 Brondani JT, Mama KR, Luna SPL, et al. Validation of the English version of the UNESP-Botucatu multidimensional composite pain scale for assessing postoperative pain in cats. *BMC Vet Res* 2013; 9: 143. DOI: 10.1186/1746-6148-9-143.
- 25 Watanabe R, Frank D and Steagall PV. Pain behaviors before and after treatment of oral disease in cats using video assessment: a prospective, blinded, randomized clinical trial. *BMC Vet Res* 2020; 16: 1–11. DOI: 10.1186/s12917-020-02302-w.
- 26 Waran N, Best L and Williams V. A preliminary study of behaviour-based indicators of pain in cats. *Anim Welf* 2007; 16: 105–108.
- 27 Steagall PV. Analgesia: what makes cats different/challenging and what is critical for cats? *Vet Clin North Am Small Anim Pract* 2020; 50: 749–767.
- 28 Calvo G, Holden E, Reid J, et al. Development of a behaviour-based measurement tool with defined intervention level for assessing acute pain in cats. *J Small Anim Pract* 2014; 55: 622–629.
- 29 Evangelista MC, Benito J, Monteiro BP, et al. Clinical applicability of the Feline Grimace Scale: real-time versus image scoring and the influence of sedation and surgery. *PeerJ* 2020; 8. DOI: 10.7717/peerj.8967.
- 30 Watanabe R, Doodnaught GM, Evangelista MC, et al. Inter-rater reliability of the Feline Grimace Scale in cats undergoing dental extractions. *Front Vet Sci* 2020; 7: 4–9. DOI: 10.3389/fvets.2020.00302.
- 31 Steagall PV, Monteiro BP, Lavoie A, et al. Validation of the French version of a multidimensional composite scale for the assessment of postoperative pain in cats [article in French]. *Can Vet J* 2017; 58: 56–64.
- 32 Della Rocca G, Catanzaro A, Conti MB, et al. Validation of the Italian version of the UNESP-Botucatu Multidimensional Composite Pain Scale for the assessment of postoperative pain in cats. *Vet Ital* 2018; 54: 49–61.
- 33 Evangelista MC and Steagall PV. Agreement and reliability of the Feline Grimace Scale among cat owners, veterinarians, veterinary students and nurses. *Sci Reports* 2021; 11: 5262. DOI: 10.1038/s41598-021-84696-7.
- 34 Benito J, Monteiro BP, Beauchamp G, et al. Evaluation of interobserver agreement for postoperative pain and sedation assessment in cats. *J Am Vet Med Assoc* 2017; 251: 544–551.
- 35 Steagall PV, Benito J, Monteiro BP, et al. Analgesic effects of gabapentin and buprenorphine in cats undergoing ovariohysterectomy using two pain-scoring systems: a randomized clinical trial. *J Feline Med Surg* 2018; 20: 741–748.
- 36 Doodnaught GM, Benito J, Monteiro BP, et al. Agreement among undergraduate and graduate veterinary students and veterinary anesthesiologists on pain assessment in cats and dogs: a preliminary study. *Can Vet J* 2017; 58: 805–808.
- 37 Benito J and Steagall PV. Postoperative analgesia between non-pregnant healthy cats versus pregnant or cats with upper respiratory tract disease [abstract]. *Vet Anaesth Analg* 2017; 44: 195.
- 38 Buisman M, Hasiuk MMM, Gunn M, et al. The influence of demeanor on scores from two validated feline pain assessment scales during the perioperative period. *Vet Anaesth Analg* 2017; 44: 646–655.
- 39 Buisman M, Wagner MC, Hasiuk MM, et al. Effects of ketamine and alfaxalone on application of a feline pain assessment scale. *J Feline Med Surg* 2016; 18: 643–651.
- 40 Simon BT, Scallan EM, Baetge CL, et al. The antinociceptive effects of intravenous administration of three doses of butorphanol tartrate or naloxone hydrochloride following hydromorphone hydrochloride to healthy conscious cats. *Vet Anaesth Analg* 2019; 46: 538–547.
- 41 Robertson S, Gogolski SM, Pascoe P, et al. AAEP feline anesthesia guidelines. *J Feline Med Surg* 2018; 20: 602–634.
- 42 Väisänen MA-M, Tuomikoski SK and Vainio OM. Behavioral alterations and severity of pain in cats recovering at home following elective ovariohysterectomy or castration. *J Am Vet Med Assoc* 2007; 231: 236–242.
- 43 Adrian D, Papich M, Baynes R, et al. Chronic maladaptive pain in cats: a review of current and future drug treatment options. *Vet J* 2017; 230: 52–61.
- 44 Steagall PV, Bustamante H, Johnson CB, et al. Pain management in farm animals: focus on cattle, sheep and pigs. *Animals* 2021; 11: 1483. DOI: 10.3390/ani11061483.
- 45 Humble SR, Dalton AJ and Li L. A systematic review of therapeutic interventions to reduce acute and chronic post-surgical pain after amputation, thoracotomy or mastectomy. *Eur J Pain* 2015; 19: 451–465.
- 46 Weibel S, Neubert K, Jeltting Y, et al. Incidence and severity of chronic pain after caesarean section. *Eur J Anaesthesiol* 2016; 33: 853–865.
- 47 Court MH. Feline drug metabolism and disposition: pharmacokinetic evidence for species differences and molecular mechanisms. *Vet Clin North Am Small Anim Pract* 2013; 43: 1039–1054.
- 48 Court MH and Greenblatt DJ. Molecular genetic basis for deficient acetaminophen glucuronidation by cats: UGT1A6 is a pseudogene, and evidence for reduced diversity of expressed hepatic UGT1A isoforms. *Pharmacogenetics* 2000; 10: 355–369.
- 49 Taylor P, Delatour P, Landont F, et al. Pharmacodynamics and enantioselective pharmacokinetics of carprofen in the cat. *Res Vet Sci* 1996; 60: 144–151.
- 50 Taylor PM, Robertson SA, Dixon MJ, et al. Morphine, pethidine and buprenorphine disposition in the cat. *J Vet Pharmacol* 2002; 24: 391–398.
- 51 Grude P, Guittard J, Garcia C, et al. Excretion mass balance evaluation, metabolite profile analysis and metabolite identification in plasma and excreta after oral administration of [<sup>14</sup>C]-meloxicam to the male cat: preliminary study. *J Vet Pharmacol* 2010; 33: 396–407.
- 52 Lehr T, Narbe R, Jöns O, et al. Population pharmacokinetic modelling and simulation of single and multiple dose administration of meloxicam in cats. *J Vet Pharmacol Ther* 2009; 33: 277–286.
- 53 Sparkes AH, Caney S, Chalhoub S, et al. ISFM consensus guidelines on the diagnosis and management of feline chronic kidney disease. *J Feline Med Surg* 2016; 18: 219–239.
- 54 Monteiro B, Steagall PV, Lascelles BDx, et al. Long-term use of non-steroidal anti-inflammatory drugs in cats with chronic kidney disease: from controversy to optimism. *J Small Anim Pract* 2019;

- 60: 459–462.
- 55 Steagall PV and Monteiro BP. Multimodal analgesia for perioperative pain in three cats. *J Feline Med Surg* 2013; 15: 737–743.
  - 56 Goich M, Bascuñán A, Faúndez P, et al. Multimodal analgesia for treatment of allodynia and hyperalgesia after major trauma in a cat. *JFMS Open Rep* 2019; 5. DOI: 10.1177/2055116919855809.
  - 57 Ruel HLM and Steagall PV. Adjuvant analgesics in acute pain management. *Vet Clin North Am Small Anim Pract* 2019; 49: 1127–1241.
  - 58 Hickman MA, Cox SR, Mahabir S, et al. Safety, pharmacokinetics and use of the novel NK-1 receptor antagonist maropitant (Cerenia™) for the prevention of emesis and motion sickness in cats. *J Vet Pharmacol Ther* 2008; 31: 220–229.
  - 59 Santos LCP, Ludders JW, Erb HN, et al. A randomized, blinded, controlled trial of the antiemetic effect of ondansetron on dexmedetomidine-induced emesis in cats. *Vet Anaesth Analg* 2011; 38: 320–327.
  - 60 Van Haaften KA, Forsythe LRE, Stelow EA, et al. Effects of a single preappointment dose of gabapentin on signs of stress in cats during transportation and veterinary examination. *J Am Vet Med Assoc* 2017; 251: 1175–1181.
  - 61 Stevens BJ, Frantz EM, Orlando JM, et al. Efficacy of a single dose of trazodone hydrochloride given to cats prior to veterinary visits to reduce signs of transport- and examination-related anxiety. *J Am Vet Med Assoc* 2016; 249: 202–207.
  - 62 Wright B, Kronen PW, Lascelles D, et al. Ice therapy: cool, current and complicated. *J Small Anim Pract* 2020; 61: 267–271.
  - 63 Carney HC, Little S, Brownlee-Tomasso D, et al. AAFP and ISFM feline-friendly nursing care guidelines. *J Feline Med Surg* 2012; 14: 337–349.
  - 64 Slingsby LS, Bortolami E and Murrell JC. Methadone in combination with medetomidine as premedication prior to ovariohysterectomy and castration in the cat. *J Feline Med Surg* 2015; 17: 864–872.
  - 65 Camargo JB, Steagall PV, Minto BW, et al. Post-operative analgesic effects of butorphanol or firocoxib administered to dogs undergoing elective ovariohysterectomy. *Vet Anaesth Analg* 2011; 38: 252–259.
  - 66 Taylor PM, Luangdilok C and Sear JW. Pharmacokinetic and pharmacodynamic evaluation of high doses of buprenorphine delivered via high-concentration formulations in cats. *J Feline Med Surg* 2016; 18: 290–302.
  - 67 Portela DA, Verdier N and Otero PE. Regional anesthetic techniques for the limb and thorax in small animals: a review of the literature and technique description. *Vet J* 2018; 241: 8–19. DOI: 10.1016/j.tvjl.2018.09.006.
  - 68 Portela DA, Verdier N and Otero PE. Regional anesthetic techniques for the pelvic limb and abdominal wall in small animals: a review of the literature and technique description. *Vet J* 2018; 238: 27–40.
  - 69 Bradbrook CA and Clark L. State of the art analgesia – recent developments in pharmacological approaches to acute pain management in dogs and cats. Part 1. *Vet J* 2018; 238: 76–82.
  - 70 Go VL and Yaksh TL. Release of substance P from the cat spinal cord. *J Physiol* 1987; 391: 141–167.
  - 71 Torrecilla M, Marker CL, Cintora SC, et al. G-protein-gated potassium channels containing Kir3.2 and Kir3.3 subunits mediate the acute inhibitory effects of opioids on locus ceruleus neurons. *J Neurosci* 2002; 22: 4328–4334.
  - 72 Mansour A, Fox CA, Thompson RC, et al.  $\mu$ -opioid receptor mRNA expression in the rat CNS: comparison to  $\mu$ -receptor binding. *Brain Res* 1994; 643: 245–265.
  - 73 Taddese A, Nah S-Y and McCleskey EW. Selective opioid inhibition of small nociceptive neurons. *Science* 1995; 270: 1366–1369.
  - 74 Pascoe PJ, Ilkiw JE and Fisher LD. Cardiovascular effects of equipotent isoflurane and alfentanil/isoflurane minimum alveolar concentration multiple in cats. *Am J Vet Res* 1997; 58: 1267–1273.
  - 75 Ilkiw JE, Pascoe PJ and Tripp LD. Effects of morphine, butorphanol, buprenorphine, and U50488H on the minimum alveolar concentration of isoflurane in cats. *Am J Vet Res* 2002; 63: 1198–1202.
  - 76 Steffey EP, Eisele JH, Baggot JD, et al. Influence of inhaled anesthetics on the pharmacokinetics and pharmacodynamics of morphine. *Anesth Analg* 1993; 77: 346–351.
  - 77 Brosnan RJ, Pypendop BH, Siao KT, et al. Effects of remifentanyl on measures of anesthetic immobility and analgesia in cats. *Am J Vet Res* 2009; 70: 1065–1071.
  - 78 Ferreira TH, Aguiar AJA, Valverde A, et al. Effect of remifentanyl hydrochloride administered via constant rate infusion on the minimum alveolar concentration of isoflurane in cats. *Am J Vet Res* 2009; 70: 581–588.
  - 79 Monteiro ER, Teixeira-Neto FJ, Campagnol D, et al. Effects of remifentanyl on the minimum alveolar concentration of isoflurane in dogs. *Am J Vet Res* 2010; 71: 150–156.
  - 80 Steagall PV, Aucoin M, Monteiro BP, et al. Clinical effects of a constant rate infusion of remifentanyl, alone or in combination with ketamine, in cats anesthetized with isoflurane. *J Am Vet Med Assoc* 2015; 246: 976–981.
  - 81 Gaumann DM, Yaksh TL, Tyce GM, et al. Sympathetic stimulating effects of sufentanyl in the cat are mediated centrally. *Neurosci Lett* 1988; 91: 30–35.
  - 82 Giordano T, Steagall PV, Ferreira TH, et al. Postoperative analgesic effects of intravenous, intramuscular, subcutaneous or oral transmucosal buprenorphine administered to cats undergoing ovariohysterectomy. *Vet Anaesth Analg* 2010; 37: 357–366.
  - 83 Steagall PV, Pelligand L, Giordano T, et al. Pharmacokinetic and pharmacodynamic modelling of intravenous, intramuscular and subcutaneous buprenorphine in conscious cats. *Vet Anaesth Analg* 2013; 40: 83–95.
  - 84 Robertson SA, Wegner K and Lascelles BDX. Antinociceptive and side-effects of hydromorphone after subcutaneous administration in cats. *J Feline Med Surg* 2009; 11: 76–81.
  - 85 Doodnaught GM, Monteiro BP, Benito J, et al. Pharmacokinetic and pharmacodynamic modelling after subcutaneous, intravenous and buccal administration of a high-concentration formulation of buprenorphine in conscious cats. *PLoS One* 2017; 12: e0176443. DOI: 10.1371/journal.pone.0176443.
  - 86 Wegner K, Robertson SA, Kollias-Baker C, et al. Pharmacokinetic and pharmacodynamic evaluation of intravenous hydromorphone in cats. *J Vet Pharmacol Ther* 2004; 27: 329–336.
  - 87 Wegner K and Robertson SA. Dose-related thermal antinociceptive effects of intravenous hydromorphone in cats. *Vet Anaesth Analg* 2007; 34: 132–138.
  - 88 Simon BT, Scallan EM, Monteiro BP, et al. The effects of aging on hydromorphone-induced thermal antinociception in healthy female cats. *Pain* 2019; 4: e722. DOI: 10.1097/PR9.0000000000000722.
  - 89 Simon BT and Steagall PV. The present and future of opioid analgesics in small animal practice. *J Vet Pharmacol Ther* 2017; 40: 315–326.
  - 90 Gurney M, Cripps P and Mosing M. Subcutaneous pre-anaesthetic medication with acepromazine-buprenorphine is effective as and less painful than the intramuscular route. *J Small Anim Pract*

- 2009; 50: 474–477.
- 91 Hofmeister EH and Egger CM. Transdermal fentanyl patches in small animals. *J Am Anim Hosp Assoc* 2004; 40: 468–478.
  - 92 Davidson CD, Pettifer GR and Henry JD. Plasma fentanyl concentrations and analgesic effects during full or partial exposure to transdermal fentanyl patches in cats. *J Am Vet Med Assoc* 2004; 224: 700–705.
  - 93 Murrell JC, Robertson SA, Taylor PM, et al. Use of a transdermal matrix patch of buprenorphine in cats: preliminary pharmacokinetic and pharmacodynamic data. *Vet Rec* 2007; 160: 578–583.
  - 94 Duke-Novakovski T, Clark CR, Ambros B, et al. Plasma concentrations of buprenorphine after epidural administration in conscious cats. *Res Vet Sci* 2011; 90: 480–483.
  - 95 DeRossi R, Hermeto LC, Jardim PHA, et al. Postoperative pain control in cats: clinical trials with pre-emptive lidocaine epidural co-administered with morphine or methadone. *J Feline Med Surg* 2016; 18: 882–888.
  - 96 Troncy E, Junot S, Keroack S, et al. Results of preemptive epidural administration of morphine with or without bupivacaine in dogs and cats undergoing surgery: 265 cases (1997–1999). *J Am Vet Med Assoc* 2002; 221: 666–672.
  - 97 Ambros B, Steagall PV, Mantovani F, et al. Antinociceptive effects of epidural administration of hydromorphone in conscious cats. *Am J Vet Res* 2009; 70: 1187–1192.
  - 98 Steagall PV, Milette V, Mantovani FB, et al. Antinociceptive effects of epidural buprenorphine or medetomidine, or the combination, in conscious cats. *J Vet Pharmacol Ther* 2009; 32: 477–484.
  - 99 Pypendop BH, Siao KT, Pascoe PJ, et al. Effects of epidurally administered morphine or buprenorphine on the thermal threshold in cats. *Am J Vet Res* 2008; 69: 983–987.
  - 100 Herperger LJ. Postoperative urinary retention in a dog following morphine with bupivacaine epidural analgesia. *Can Vet J* 1998; 39: 650–652.
  - 101 Scallan EM and Simon BT. The effects of acupuncture point Pericardium 6 on hydromorphone-induced nausea and vomiting in healthy dogs. *Vet Anaesth Analg* 2016; 43: 495–501.
  - 102 Martin-Flores M, Mastrocco A, Lorenzutti AM, et al. Maropitant administered orally 2–2.5 h prior to morphine and dexmedetomidine reduces the incidence of emesis in cats. *J Feline Med Surg* 2017; 19: 876–879.
  - 103 Martin-Flores M, Sakai DM, Learn MM, et al. Effects of maropitant in cats receiving dexmedetomidine and morphine. *J Am Vet Med Assoc* 2016; 248: 1257–1261.
  - 104 Martin-Flores M, Sakai DM, Mastrocco A, et al. Evaluation of oral maropitant as an antiemetic in cats receiving morphine and dexmedetomidine. *J Feline Med Surg* 2016; 18: 921–924.
  - 105 Kenward H, Elliott J, Lee T, et al. Anti-nausea effects and pharmacokinetics of ondansetron, maropitant and metoclopramide in a low-dose cisplatin model of nausea and vomiting in the dog: a blinded crossover study. *BMC Vet Res* 2017; 13: 244. DOI: 10.1186/s12917-017-1156-7.
  - 106 Robertson SA. Managing pain in feline patients. *Vet Clin North Am Small Anim Pract* 2008; 38: 1267–1290.
  - 107 Ingwersen W, Fox R, Cunningham G, et al. Efficacy and safety of 3 versus 5 days of meloxicam as an analgesic for feline onychectomy and sterilization. *Can Vet J* 2012; 53: 257–264.
  - 108 Speranza C, Schmid V, Giraudel JM, et al. Robenacoxib versus meloxicam for the control of peri-operative pain and inflammation associated with orthopaedic surgery in cats: a randomised clinical trial. *BMC Vet Res* 2015; 11: 79. DOI: 10.1186/s12917-015-0391-z.
  - 109 King S, Roberts ES and King JN. Evaluation of injectable robenacoxib for the treatment of post-operative pain in cats: results of a randomized, masked, placebo-controlled clinical trial. *BMC Vet Res* 2016; 12: 215. DOI: 10.1186/s12917-016-0827-0.
  - 110 Sattasathuchana P, Phuwapattanachart P and Thengchaisri N. Comparison of post-operative analgesic efficacy of tolafenamic acid and robenacoxib in ovariohysterectomized cats. *J Vet Med Sci* 2018; 80: 989–996.
  - 111 Slingsby LS and Waterman-Pearson AE. Postoperative analgesia in the cat after ovariohysterectomy by use of carprofen, ketoprofen, meloxicam or tolafenamic acid. *J Small Anim Pract* 2000; 41: 447–450.
  - 112 Sano T, King JN, Seewald W, et al. Comparison of oral robenacoxib and ketoprofen for the treatment of acute pain and inflammation associated with musculoskeletal disorders in cats: a randomised clinical trial. *Vet J* 2012; 193: 397–403.
  - 113 Morton CM, Grant D, Johnston L, et al. Clinical evaluation of meloxicam versus ketoprofen in cats suffering from painful acute locomotor disorders. *J Feline Med Surg* 2011; 13: 237–243.
  - 114 Kongara K and Chambers P. Robenacoxib in the treatment of pain in cats and dogs: safety, efficacy, and place in therapy. *Vet Med (Auckl)* 2018; 9: 53–61. DOI: 10.2147/vmr.s170893.
  - 115 Sparkes AH, Heiene R, Lascelles BD, et al. ISFM and AAEP consensus guidelines: long-term use of NSAIDs in cats. *J Feline Med Surg* 2010; 12: 521–538.
  - 116 Monteiro B and Steagall PV. Antiinflammatory drugs. *Vet Clin North Am Small Anim Pract* 2019; 49: 993–1011.
  - 117 Giraudel JM, Gruet P, Alexander DG, et al. Evaluation of orally administered robenacoxib versus ketoprofen for treatment of acute pain and inflammation associated with musculoskeletal disorders in cats. *Am J Vet Res* 2010; 71: 710–719.
  - 118 Grubb T and Lobprise H. Local and regional anaesthesia in dogs and cats: overview of concepts and drugs (part 1). *Vet Med Sci* 2020; 6: 209–217.
  - 119 Vicente D and Bergström A. Evaluation of intraoperative analgesia provided by incisional lidocaine and bupivacaine in cats undergoing ovariohysterectomy. *J Feline Med Surg* 2018; 20: 922–927.
  - 120 Moldal ER, Eriksen T, Kirpensteijn J, et al. Intratesticular and subcutaneous lidocaine alters the intraoperative haemodynamic responses and heart rate variability in male cats undergoing castration. *Vet Anaesth Analg* 2013; 40: 63–73.
  - 121 Aguiar J, Chebroux A, Martinez-Taboada F, et al. Analgesic effects of maxillary and inferior alveolar nerve blocks in cats undergoing dental extractions. *J Feline Med Surg* 2015; 17: 110–116.
  - 122 Zilberstein LF, Moens YP and Letierrier E. The effect of local anaesthesia on anaesthetic requirements for feline ovarioectomy. *Vet J* 2008; 178: 214–218.
  - 123 Robertson SA and Taylor PM. Pain management in cats – past, present and future. Part 2. Treatment of pain – clinical pharmacology. *J Feline Med Surg* 2004; 6: 321–333.
  - 124 Gordon-Evans WJ, Suh HY and Guedes AG. Controlled, non-inferiority trial of bupivacaine liposome injectable suspension. *J Feline Med Surg* 2020; 22: 916–921.
  - 125 Niemiec B, Gawor J, Nemec A, et al. World Small Animal Veterinary Association global dental guidelines. *J Small Anim Pract* 2020; 61. DOI: 10.1111/jsap.13132.
  - 126 Oliveira RL, Soares JH, Moreira CM, et al. The effects of lidocaine–prilocaine cream on responses to intravenous catheter placement in cats sedated with dexmedetomidine and either methadone or nalbuphine. *Vet Anaesth Analg* 2019; 46: 492–495.
  - 127 O'Brien TQ, Clark-Price SC, Evans EE, et al. Infusion of a lipid emulsion to treat lidocaine intoxication in a cat. *J Am Vet Med Assoc* 2010; 237: 1455–1458.

- 128 Maierl J and Liebich H-G. Investigations on the postnatal development of the macroscopic proportions and the topographic anatomy of the feline spinal cord. *Anat Histol Embryol* 1998; 27: 375–379.
- 129 Pratt CL, Balakrishnan A, McGowan E, et al. A prospective randomized, double-blinded clinical study evaluating the efficacy and safety of bupivacaine versus morphine–bupivacaine in caudal epidurals in cats with urethral obstruction. *J Vet Emerg Crit Care* 2020; 30: 170–178.
- 130 O'Hearn AK and Wright BD. Coccygeal epidural with local anesthetic for catheterization and pain management in the treatment of feline urethral obstruction. *J Vet Emerg Crit Care* 2011; 21: 50–52.
- 131 Credie L and Luna S. The use of ultrasound to evaluate sacrococcygeal epidural injections in cats. *Can Vet J* 2018; 59: 143–146.
- 132 Fudge JM, Page B, Mackrell A, et al. Evaluation of targeted bupivacaine for reducing acute postoperative pain in cats undergoing routine ovariohysterectomy. *J Feline Med Surg* 2020; 22: 91–99.
- 133 Yilmaz ÖT, Toydemir TSF, Kirşan I, et al. Effects of surgical wound infiltration with bupivacaine on postoperative analgesia in cats undergoing bilateral mastectomy. *J Vet Med Sci* 2014; 76: 1595–1601.
- 134 Crisi PE, De Santis F, Giordano MV, et al. Evaluation of eutectic lidocaine/prilocaine cream for jugular blood sampling in cats. *J Feline Med Surg* 2021; 23: 185–189.
- 135 Wagner KA, Gibbon KJ, Strom TL, et al. Adverse effects of EMLA (lidocaine/prilocaine) cream and efficacy for the placement of jugular catheters in hospitalized cats. *J Feline Med Surg* 2006; 8: 141–144.
- 136 Gibbon KJ, Cyborski JM, Guzinski MV, et al. Evaluation of adverse effects of EMLA (lidocaine/prilocaine) cream for the placement of jugular catheters in healthy cats. *J Vet Pharmacol Ther* 2003; 26: 439–441.
- 137 Steagall PV, Benito J, Monteiro B, et al. Intraperitoneal and incisional analgesia in small animals: simple, cost-effective techniques. *J Small Anim Pract* 2020; 61: 19–23.
- 138 Benito J, Monteiro B, Lavoie AM, et al. Analgesic efficacy of intraperitoneal administration of bupivacaine in cats. *J Feline Med Surg* 2016; 18: 906–912.
- 139 Benito J, Evangelista MC, Doodnaught GM, et al. Analgesic efficacy of bupivacaine or bupivacaine–dexmedetomidine after intraperitoneal administration in cats: a randomized, blinded, clinical trial. *Front Vet Sci* 2019; 6: 307. DOI: 10.3389/fvets.2019.00307.
- 140 Benito J, Monteiro BP, Beaudry F, et al. Pharmacokinetics of bupivacaine after intraperitoneal administration to cats undergoing ovariohysterectomy. *Am J Vet Res* 2016; 77: 641–645.
- 141 Benito J, Monteiro B, Beaudry F, et al. Efficacy and pharmacokinetics of bupivacaine with epinephrine or dexmedetomidine after intraperitoneal administration in cats undergoing ovariohysterectomy. *Can J Vet Res* 2018; 82: 124–130.
- 142 De OL Carapeba G, Nicácio IPGA, Stelle ABF, et al. Comparison of perioperative analgesia using the infiltration of the surgical site with ropivacaine alone and in combination with meloxicam in cats undergoing ovariohysterectomy. *BMC Vet Res* 2020; 16: 88. DOI: 10.1186/s12917-020-02303-9.
- 143 Nicácio IP, Stelle ABF, Bruno TS, et al. Comparison of intraperitoneal ropivacaine and ropivacaine–dexmedetomidine for postoperative analgesia in cats undergoing ovariohysterectomy. *Vet Anaesth Analg* 2020; 47: 396–404.
- 144 Soltaninejad H and Vesal N. Plasma concentrations of lidocaine following laryngeal administration or laryngeal and intratesticular administration in cats. *Am J Vet Res* 2018; 79: 614–620.
- 145 Fernandez-Parra R, Zilberstein L, Fontaine C, et al. Comparison of intratesticular lidocaine, sacrococcygeal epidural lidocaine and intravenous methadone in cats undergoing castration: a prospective, randomized, investigator-blind clinical trial. *Vet Anaesth Analg* 2017; 44: 356–363.
- 146 Watanabe R, Doodnaught G, Proulx C, et al. A multidisciplinary study of pain in cats undergoing dental extractions: a prospective, blinded, clinical trial. *PLoS One* 2019; 14: e0213195. DOI: 10.1371/journal.pone.0213195.
- 147 Rochette J. Regional anesthesia and analgesia for oral and dental procedures. *Vet Clin North Am Small Anim Pract* 2005; 35: 1041–1058.
- 148 Gross ME, Pope ER, Jarboe JM, et al. Regional anesthesia of the infraorbital and inferior alveolar nerves during noninvasive tooth pulp stimulation in halothane-anesthetized cats. *Am J Vet Res* 2000; 61: 1245–1247.
- 149 Grubb T and Lobprise H. Local and regional anaesthesia in dogs and cats: descriptions of specific local and regional techniques (part 2). *Vet Med Sci* 2020; 6: 218–234.
- 150 Perry R, Moore D and Scurrrell E. Globe penetration in a cat following maxillary nerve block for dental surgery. *J Feline Med Surg* 2015; 17: 66–72.
- 151 Volk H, Bayley K, Fiani N, et al. Ophthalmic complications following ocular penetration during routine dentistry in 13 cats. *N Z Vet J* 2019; 67: 46–51.
- 152 Aprea F, Vettorato E and Corletto F. Severe cardiovascular depression in a cat following a mandibular nerve block with bupivacaine. *Vet Anaesth Analg* 2011; 38: 614–618.
- 153 Simon BT and Steagall PV. Feline procedural sedation and analgesia: when, why and how. *J Feline Med Surg* 2020; 22: 1029–1045.
- 154 Pereira MA, Campos KD, Gonçalves LA, et al. Cyclooxygenases 1 and 2 inhibition and analgesic efficacy of dipyron at different doses or meloxicam in cats after ovariohysterectomy. *Vet Anaesth Analg* 2021; 48: 7–16.
- 155 Chandrasekharan NV, Dai H, Roos KLT, et al. COX-3, a cyclooxygenase-1 variant inhibited by acetaminophen and other analgesic/ antipyretic drugs: cloning, structure, and expression. *Proc Natl Acad Sci* 2002; 99: 13926139–31. DOI: 10.1073/pnas.162468699.
- 156 Jasińska A, Maślanka T and Jaroszewski JJ. Pharmacological characteristics of metamizole. *Pol J Vet Sci* 2014; 17: 207–214.
- 157 Zanuzzo FS, Teixeira-Neto FJ, Teixeira LR, et al. Analgesic and antihyperalgesic effects of dipyron, meloxicam or a dipyron–meloxicam combination in bitches undergoing ovariohysterectomy. *Vet J* 2015; 205: 33–37.
- 158 Teixeira LG, Martins LR, Schimites PI, et al. Evaluation of postoperative pain and toxicological aspects of the use of dipyron and tramadol in cats. *J Feline Med Surg* 2020; 22: 467–475.
- 159 Lebrowska-Wieruszewska B, Kim TW, Chea B, et al. Pharmacokinetic profiles of the two major active metabolites of metamizole (dipyron) in cats following three different routes of administration. *J Vet Pharmacol Ther* 2018; 41: 334–339.
- 160 Cheng J-K and Chiou L-C. Mechanisms of the antinociceptive action of gabapentin. *J Pharmacol Sci* 2006; 100: 471–486.
- 161 Adrian D, Papich MG, Baynes R, et al. The pharmacokinetics of gabapentin in cats. *J Vet Intern Med* 2018; 32: 1996–2002.
- 162 Siao KT, Pypendop BH and Ilkiw JE. Pharmacokinetics of gabapentin in cats. *Am J Vet Res* 2010; 71: 817–821.
- 163 Slovak JE and Costa AP. A pilot study of transdermal gabapentin

- in cats. *J Vet Intern Med* 2021; 35: 1981–1987.
- 164 Vettorato E and Corletto F. Gabapentin as part of multi-modal analgesia in two cats suffering multiple injuries. *Vet Anaesth Analg* 2011; 38: 518–520.
  - 165 Pankratz KE, Ferris KK, Griffith EH, et al. Use of single-dose oral gabapentin to attenuate fear responses in cage-trap confined community cats: a double-blind, placebo-controlled field trial. *J Feline Med Surg* 2018; 20: 535–543.
  - 166 Pozzi A, Muir WW and Traverso F. Prevention of central sensitization and pain by N-methyl-D-aspartate receptor antagonists. *J Am Vet Med Assoc* 2006; 228: 53–60.
  - 167 Brondani JT, Luna LSP, Beier SL, et al. Analgesic efficacy of perioperative use of vedaprofen, tramadol or their combination in cats undergoing ovariohysterectomy. *J Feline Med Surg* 2009; 11: 420–429.
  - 168 Steagall PV, Taylor PM, Brondani JT, et al. Antinociceptive effects of tramadol and acepromazine in cats. *J Feline Med Surg* 2008; 10: 24–31.
  - 169 Pypendop BH and Ilkiw JE. Pharmacokinetics of tramadol, and its metabolite O-desmethyl-tramadol, in cats. *J Vet Pharmacol Ther* 2008; 31: 52–59.
  - 170 Indrawirawan Y and McAlees T. Tramadol toxicity in a cat: case report and literature review of serotonin syndrome. *J Feline Med Surg* 2014; 16: 572–578.
  - 171 Steagall PV, Pelligand L, Page SW, et al; WSAVA Therapeutic Guidelines Group (TGG). The World Small Animal Veterinary Association (WSAVA): list of essential medicines for cats and dogs. *J Small Anim Pract* 2020; 16: 61. DOI: 10.1111/jsap.13135.
  - 172 Beloeil H. Opioid-free anesthesia. *Best Pract Res Clin Anaesthesiol* 2019; 33: 353–360.
  - 173 Chia PA, Cannesson M and Bui CCM. Opioid free anesthesia: feasible? *Curr Opin Anaesthesiol* 2020; 33: 512–517.
  - 174 Forget P. Opioid-free anaesthesia. Why and how? A contextual analysis. *Anaesth Crit Care Pain Med* 2019; 38: 169–172.
  - 175 Diep TN, Monteiro BP, Evangelista MC, et al. Anesthetic and analgesic effects of an opioid-free, injectable protocol in cats undergoing ovariohysterectomy: a prospective, blinded, randomized clinical trial. *Can Vet J* 2020; 61: 621–628.
- Lue TW, Pantenburg DP, Crawford PM.: Impact of the owner–pet and client–veterinarian bond on the care that pets receive, *J Am Vet Med Assoc*, **232**: 531–40, 2008.

Available online at [jfms.com](https://journals.sagepub.com/jfms)

Article reuse guidelines: [sagepub.co.uk/journals-permissions](https://sagepub.co.uk/journals-permissions)
